1 **Adaptations of energy metabolism in cetaceans have consequences for their response to**  
2 **foraging disruption**

3 Davina Derous<sup>1\*</sup>, Jagajjit Sahu<sup>1</sup>, Alex Douglas<sup>1</sup> and David Lusseau<sup>1</sup>, Marius Wenzel<sup>2\*</sup>

4 1. Institute of Biological and Environmental Sciences, University of Aberdeen, Aberdeen,  
5 Scotland, UK

6 2. Centre for Genome Enabled Biology and Medicine, University of Aberdeen, Aberdeen,  
7 Scotland, UK

8 \*Corresponding author:

9 DD: Email: [davina.derous@abdn.ac.uk](mailto:davina.derous@abdn.ac.uk)

10 Tel: [+44 \(0\)1224 273637](tel:+44(0)1224273637)

11 DL: Email: [d.lusseau@abdn.ac.uk](mailto:d.lusseau@abdn.ac.uk)

12 Tel: [+44 \(0\)1224 272843](tel:+44(0)1224272843)

13 MW: Email: [marius.wenzel@abdn.ac.uk](mailto:marius.wenzel@abdn.ac.uk)

14 Tel: +44(0)1224 273471

15 Key words: cetaceans, mTOR, insulin, NF- $\kappa$ B, evolution, PCoD, PCoMS

16

17

18

19 **Abstract**

20 Cetaceans have varied their anatomical structure, physiology and metabolism to adapt to the  
21 challenges of aquatic life. Key to this change is the deposition of blubber. This adipose tissue  
22 plays a significant regulatory and signaling role in mammalian metabolism. As foraging  
23 disruption by human activities is emerging as a key conservation threat for cetaceans, we  
24 need to understand how selection for aquatic life might have altered key nutrient sensing  
25 pathways associated with adipose signaling. We compared selection pressure on those  
26 energy metabolism biological pathways by contrasting the rate of substitution observed in  
27 genes associated with them in cetacean and artiodactyl genomes. We then estimated the  
28 likely consequence of these selection pressures for pathway functions. Here we show that  
29 genes involved in the insulin, mTOR, SIRT and NF- $\kappa$ B pathways were under significant positive  
30 selection in cetaceans compared to their terrestrial sister taxon. Our results suggest these  
31 genes may have been positively selected to adapt to a glucose-poor diet and it is unlikely that  
32 fat depots signaling function in the same manner as in terrestrial mammals. Secondary  
33 adaptation to life in water significantly affected functions in nutrient sensing pathways in  
34 cetaceans. Insulin is not likely to play the same role in energy balance as it does in terrestrial  
35 mammals and adiposity is not likely to have the deleterious health consequences it has in  
36 terrestrial mammals. The physiological ecology of cetacean fat deposition, and therefore its  
37 value as a condition index, needs to be interpreted in this evolutionary context.

38

39

## 40 **Introduction**

41           Cetaceans are mammals that transitioned from a terrestrial to an aquatic lifestyle  
42 approximately 53–56 million years ago by adapting their anatomical structure, physiology and  
43 metabolism. These critical morphological and physiological adaptations ensured the  
44 maintenance of body temperature and energy reserves (Parry, 1949; Scholander, Walters,  
45 Hock, & Irving, 1950). For example, this included a thickening of the blubber (i.e. adipose  
46 tissue equivalent) to provide thermal insulation, to deal with more sporadic foraging  
47 opportunities, and to support locomotion (Vasseur & Yodzis, 2004; T M Williams, Friedl, &  
48 Haun, 1993; Terrie M. Williams, Haun, Davis, Fuiman, & Kohin, 2001). Crucially, these  
49 adaptations impact the ways in which individuals decide to invest in reproduction and define  
50 their abilities to survive under varied environmental pressures, in particular nutrient  
51 availability. Human-caused perturbations, such as shipping, tourism, naval activities, coastal  
52 urbanization and offshore energy development, can perturb environmental nutrient levels  
53 and affect cetacean foraging abilities. These factors are becoming a pervasive and prevalent  
54 threat to many cetacean species (Pirodda et al., 2018) and are a key priority in cetacean  
55 conservation policy (eg. National Academies of Sciences, Engineering, 2017).

56           Cetaceans detect fluctuations in environmental nutrient levels by nutrient sensing  
57 pathways and some of these are evolutionary conserved across species (Chantranupong,  
58 Wolfson, & Sabatini, 2015). These pathways detect intracellular and extracellular levels of  
59 sugar, amino acids and lipids and their surrogate metabolites. Nutrients can trigger the  
60 release of several hormones, which induce coherent responses in several pathways involved  
61 in regulating metabolism. Unsurprisingly, a large portion of positively selected genes in  
62 cetaceans are involved in energy metabolism (Nery, González, & Opazo, 2013). Bottlenose  
63 dolphins (*Tursiops truncatus*) show insulin resistance likely caused by early metabolic shifts in

64 substrate utilization as the species shifted from a terrestrial high carbohydrate diet to a  
65 marine high protein diet (Wang et al., 2016). Dolphin diet has a high fat and protein content  
66 and is almost devoid of carbohydrates (Wells et al., 2013). Fasted healthy bottlenose dolphins  
67 (*Tursiops truncatus*) have elevated fasting plasma glucose concentration that are similar to  
68 diabetic humans (S. Venn-Watson, Carlin, & Ridgway, 2011; S. K. Venn-Watson & Ridgway,  
69 2007).. During fasting, metabolism is believed to be primarily fueled by large adipose stores  
70 (i.e. blubber) that are mobilized in response to insulin suppression (Duncan, Ahmadian,  
71 Jaworski, Sarkadi-Nagy, & Sul, 2007).

72 This fasting response is expected to take place when foraging is disrupted in the wild by  
73 human activities. Regulatory genes related to lipolysis are positively selected in cetacean-  
74 specific lineages but not in terrestrial mammals (Wang et al., 2015). Specifically, genes related  
75 to triacylglycerol (TAG) metabolism were suggested to play an essential role in the secondary  
76 adaption of cetaceans to aquatic life (Wang et al., 2015). The processes of lipid deposition  
77 and utilization is regulated by the gene leptin (LEP) (Duncan et al., 2007). Recent work shows  
78 that in bowhead whales (*Balaena mysticetus*) and belugas (*Delphinapterus leucas*), the  
79 regulation of LEP and lipolysis is adapted to seasonal cycles of blubber deposition and  
80 utilization (Ball et al., 2017). Although adipose tissue biology of terrestrial mammals show a  
81 similarity to the functioning of cetacean blubber, some differences in key genes have been  
82 identified (Ball et al., 2017). These changes have therefore the scope to alter the way  
83 individual take biological decisions about demographic contributions, particularly  
84 reproduction, given their energetic metabolic state. We need to place gene selection in the  
85 context of the biological pathways in which they are involved to contextualize those changes  
86 and understand the potential demographic consequences of foraging disruption when the  
87 environmental nutrient levels of cetaceans are perturbed. Here, we aimed to determine

88 whether the selective pressure from secondary adaptations to life in water led to a change in  
89 the key nutrient signaling pathways. We aim to predict whether these changes are likely to  
90 affect biological functions.

## 91 **Material and Methods**

92 To understand the evolutionary-driven changes in the regulation of metabolic  
93 processes in cetaceans, we took a targeted approach and focused on 6 signaling pathways:  
94 the p53 signaling pathway, the insulin signaling pathway, the mTOR signaling pathway, the  
95 leptin signaling pathway, the NF- $\kappa$ B signaling pathway and the SIRT signaling pathway. A total  
96 of 532 genes involved in these pathways were obtained from the Kyoto Encyclopedia of Genes  
97 and Genomes (KEGG) website (<http://www.genome.jp/kegg/>) and from the Ingenuity  
98 Pathway Analysis (IPA) program (version 2000-2019, Ingenuity Systems, [www.ingenuity.com](http://www.ingenuity.com)).

99

### 100 *Analysis of positive gene selection and amino-acid substitutions*

101 We obtained the full amino-acid sequences from 532 human KEGG proteins included in our  
102 pathways of interest and downloaded from *NCBI* the genome assemblies of human, mouse, 16  
103 cetacean species and 37 artiodactyl species (Table S1). We aligned the KEGG proteins to all  
104 genomes using *EXONERATE* 2.2.0 (Slater & Birney, 2005) with the *protein2genome* model to  
105 allow for spliced alignments across introns. For each genome, the single match with the  
106 highest alignment score was retained and the nucleotide sequence of the match was  
107 extracted. If multiple best matches with the same score were present, one match was chosen  
108 at random. Sequences were codon-aligned with guidance from corresponding amino-acid  
109 alignments and allowing for frame-shifts using *MACSE* 2.03 (Ranwez, Douzery, Cambon,  
110 Chantret, & Delsuc, 2018), and maximum-likelihood gene trees were inferred in *IQ-TREE* 1.6.8

111 (Nguyen, Schmidt, Von Haeseler, & Minh, 2015) with automatic selection of nucleotide  
112 substitution models. A species tree was then inferred from all 532 gene trees using *ASTRAL-III*  
113 5.6.3 (Zhang, Rabiee, Sayyari, & Mirarab, 2018) and rooted at the two outgroups human and  
114 mouse.

115 Codon sequence evolution was modelled in the *codeml* program of *PAML* 4.9f (Yang, 2007),  
116 using the species tree with a trifurcated root (=derooted). To minimize the impact of missing  
117 data, all codons with more than 20 % missing data were removed from the alignments using  
118 *TRIMAL* 1.4 (Capella-Gutiérrez, Silla-Martínez, & Gabaldón, 2009). Three types of models were  
119 run per alignment. First, the null model estimated a single dN:dS ratio ( $\omega$ ) for the entire  
120 alignment. Second, the branch model (model = 2; NSsites = 0) estimated a single  $\omega$  for all  
121 cetacean lineages (foreground) and a second  $\omega$  for all other lineages (background). Third, the  
122 branch-site model (model = 2; NSsites = 2) estimated different  $\omega$  among codons within the  
123 foreground and background branches. The branch models and branch-site models were each  
124 run twice, either allowing the foreground  $\omega$  to vary freely or fixing  $\omega$  at 1 (=neutral evolution).  
125 The statistical significance of the free  $\omega$  estimates of interest was obtained via likelihood-ratio  
126 tests carried out in *R* 3.4.0 (R Core Team, 2014). Both the free branch model and the free  
127 branch-site model were contrasted with their corresponding neutral models and with the null  
128 model by comparing twice the difference in likelihood ( $2\Delta L$ ) of the models against a *Chi*-  
129 square distribution with one degree of freedom. *P*-values were corrected for multiple testing  
130 across all genes within each type of contrast using the false-discovery-rate method (Benjamini  
131 & Hochberg, 1995).

132 From all branch-site models with free  $\omega$  that fitted significantly better than the neutral  
133 branch-site model and the null model, we identified the specific codons under positive  
134 selection in the cetacean lineage using the Bayes Empirical Bayes (BEB) method (Yang, 2007).

135 We then examined whether the amino-acid substitutions in the cetacean lineage at these  
136 sites would have detrimental effects on the function of the protein using *PROVEAN* 1.1.5 (Choi,  
137 Sims, Murphy, Miller, & Chan, 2012). For each protein, the *Homo sapiens* sequence was used  
138 as the reference sequence, and the single most frequent alternative amino acid observed  
139 among the 16 cetacean genomes was queried.

140

#### 141 *Pathway level comparison*

142 The value of statistically significant likelihood-ratio test statistics ( $2\Delta L$ ) between the  
143 positive and neutral branch-models were used as a measure to visualize the interactions of  
144 the positive gene selection at a pathway level using IPA signaling pathways for each of the  
145 target pathway (version 2000-2019, Ingenuity Systems, [www.ingenuity.com](http://www.ingenuity.com)). IPA did not  
146 have a prebuilt sirtuin signaling pathway. We therefore manually constructed this pathway  
147 based on the summarized data by Nakagawa and Guarente (2011) (Nakagawa & Guarente,  
148 2011).

149

#### 150 *Prediction of functional effects*

151 Deleterious amino acid substitutions (*PROVEAN* scores  $\leq -2.5$ ) in positively selected  
152 codons were visualized using IPA and possible downstream effects in the pathways based on  
153 the damaged protein were predicted using the Molecule Activity Predictor (MAP) function in  
154 IPA.

155

156 **Results**

157 *Strength of selective pressure on genes involved in nutrient sensing pathways*

158         The species tree inferred from all gene trees (Fig 1) was consistent with published  
159 cetacean and artiodactylan phylogenies (Zurano et al., 2019). Alignment-wide  $\omega$  estimates  
160 from the PAML null models were  $<1$  for all but one gene (median: 0.08; mean: 0.12),  
161 consistent with a baseline of strong purifying selection on protein function across all taxa and  
162 all codons (Fig 2A). Contrasting the cetacean group with all other taxa using branch models  
163 revealed that 224 out of 532 genes (42.1 %) departed significantly ( $q \leq 0.05$ ) from neutral  
164 codon evolution ( $\omega \neq 1$ ), but all of these genes were under purifying selection ( $\omega < 1$ ) instead  
165 of positive selection ( $\omega > 1$ ). Only seven genes were candidates for positive selection ( $\omega > 1$ ),  
166 but none of these estimates were significant (Fig 2B). In contrast, branch-site models revealed  
167 significant ( $q \leq 0.05$ ) positive selection ( $\omega > 1$ ; median: 9.67; mean: 39.64) in the cetacean  
168 group on a small subset of codons in 133 of 532 genes (25 %) (Fig 2C).



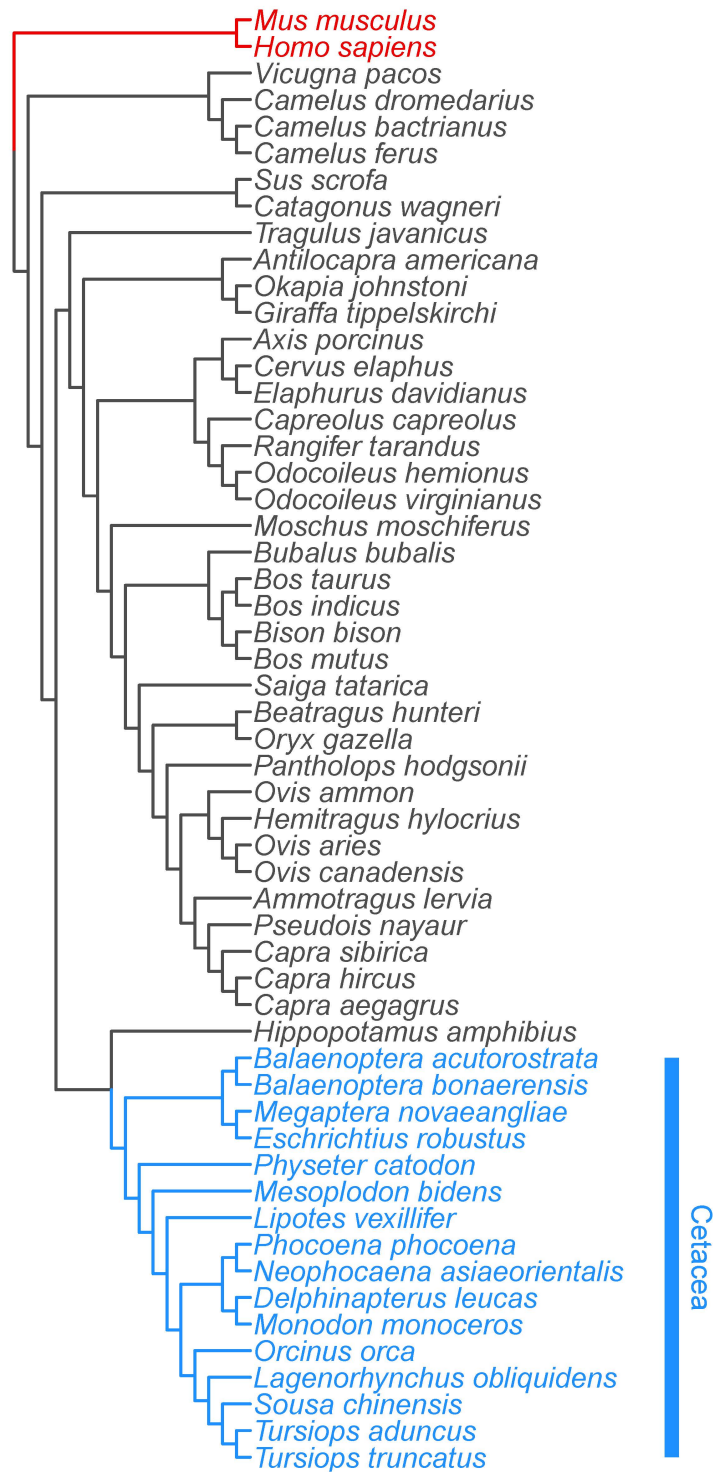

169

170 Figure 1. Species cladogram of the cetacea ingroup (blue) and artiodactyla, human and mouse

171 outgroups (black and red), derived from 532 gene alignments.

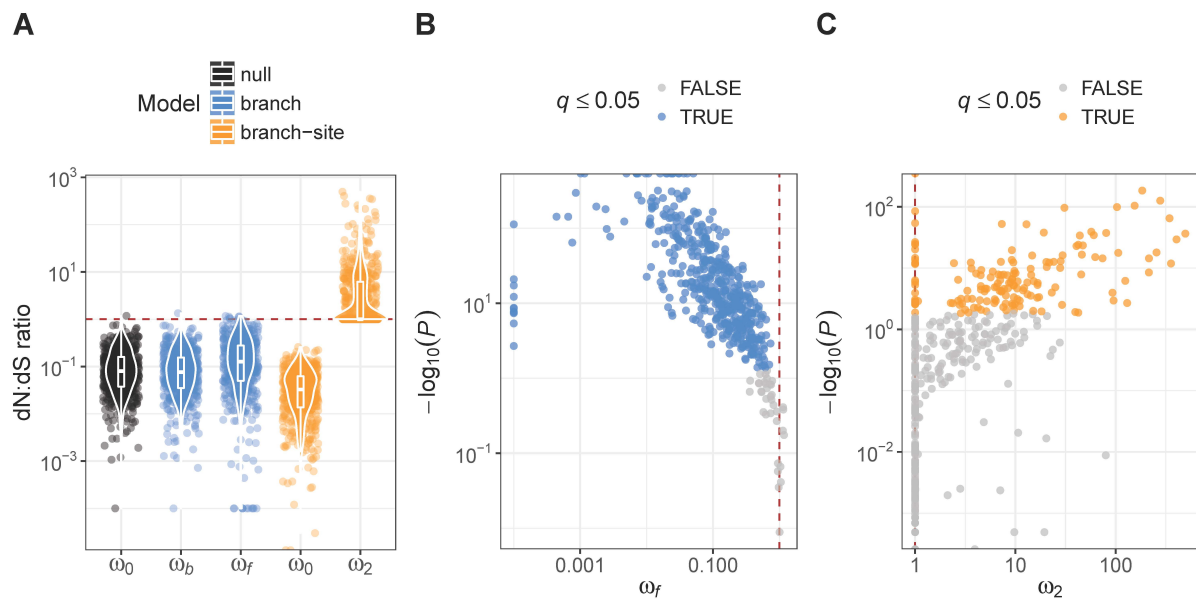

172  
 173 Figure 2: Ratios of non-synonymous vs. synonymous nucleotide substitution rates (dN:dS  
 174 ratios;  $\omega$ ) in 532 genes estimated from codon evolution models in PAML. A) baseline  
 175 estimates for whole alignments from null models ( $\omega_0$ ), estimates for foreground (cetacea;  $\omega_f$ )  
 176 and background (all others;  $\omega_b$ ) branches from branch models, and estimates for codons  
 177 under purifying ( $\omega_0$ ) and positive ( $\omega_2$ ) selection in foreground branch (cetacea) from branch-  
 178 site models. B) Foreground dN:dS ratio ( $\omega_f$ ) and statistical significance ( $P$ -value) from  
 179 likelihood-ratio tests between free-ratio branch models and neutral branch models.  
 180 Significant tests after FDR correction ( $q \leq 0.05$ ) are highlighted in blue. C) Foreground dN:dS  
 181 ratio of positively selected codons ( $\omega_2$ ) and statistical significance ( $P$ -value) from likelihood-  
 182 ratio tests between positive-selection branch-site models and neutral branch-site models.  
 183 Significant tests after FDR correction ( $q \leq 0.05$ ) are highlighted in orange. The red dashed lines  
 184 in all plots represent neutral evolution ( $\omega = 1$ ).  
 185

### 186 *Positive gene selection at the pathway level*

187 We then visualized the interactions of the positive gene selection at a pathway level  
 188 using IPA signaling pathways. Insulin signaling (Fig S1, Table S2), mTOR signaling (Fig S2, Table  
 189 S3), NF- $\kappa$ B signaling (Fig S3, Table S4) and SIRT signaling (Fig S4, Table S5) were found to be  
 190 positively selected, especially those related to glucose metabolism and inflammation. Genes  
 191 particularly upstream from lipid metabolism, cell growth and proliferation and apoptosis  
 192 functions were positively selected in the cetacean lineage. Little differences in selection were  
 193 found for p53 signaling (Fig S5, Table S6) and leptin signaling (Fig S6, Table S7).

194

195 *Prediction of functional effects*

196 Using the BEB method in PAML, a total of 1936 codons among the 133 genes positively  
197 selected in the cetacean lineage (mean 14.78 codons per gene) were under positive selection.  
198 The predicted functional effects of the amino-acid substitutions in cetacea were  
199 predominantly deleterious (median provean score: -2.9) and only 8.5 % of substitutions had  
200 a positive score (Fig 3).

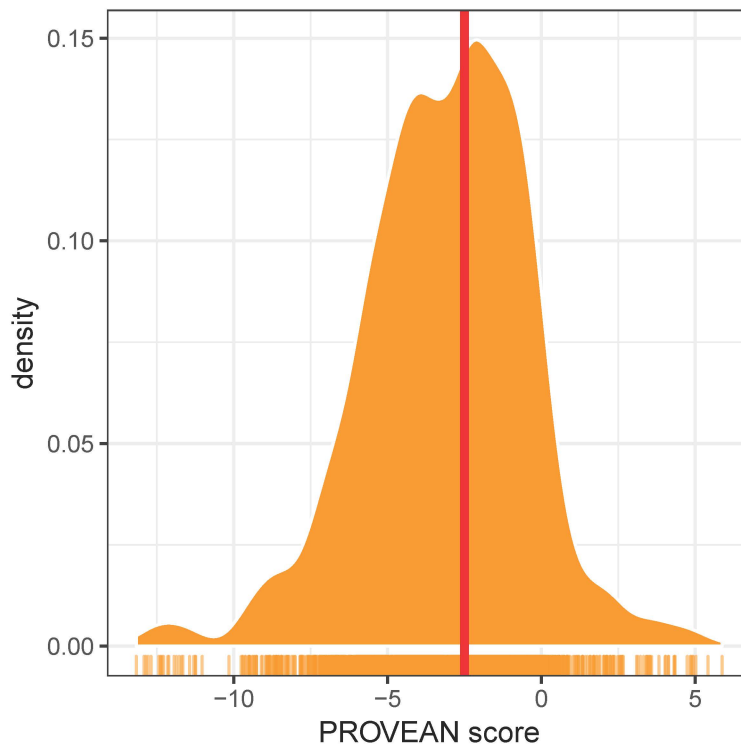

201 Figure 3. Distribution of *PROVEAN* scores of 1936 amino-acid substitutions under positive  
202 selection in cetacea. The red line indicates the standard threshold (-2.5) below which the  
203 effect of a substitution is considered deleterious.  
204

205  
206 These deleterious effects were likely to impact the way biological processes function.  
207 Unsurprisingly, glucose metabolism is expected to be altered with changes in insulin signaling  
208 (Fig 4), SIRT3 signaling with downstream regulation of insulin sensitivity, PPARA signaling with  
209 downstream regulation of gluconeogenesis and oxidation of fatty acids (Fig 5). In addition, we  
210 expect changes in upstream signaling of inflammation, hypoxia and cell survival via SIRT6,  
211 RB1, NFKB and HIF1a (Fig 5&6). Importantly, both the mTOR complexes and its upstream and  
212 downstream genes were estimated to be changed (Fig 7). The changes would have effects on  
213 nutrient sensing and protein synthesis as well as key biological decisions about energetic  
214 investment such as shift to glycolysis and de novo lipid synthesis.

215

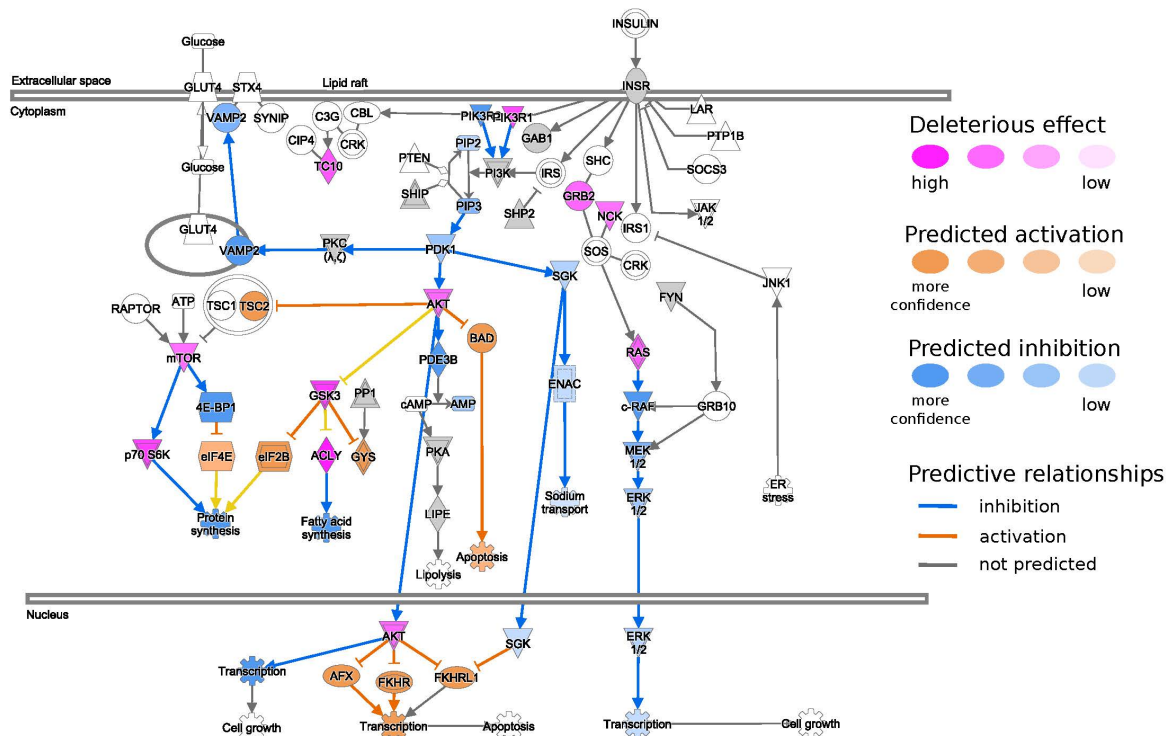

216

© 2000-2019 QIAGEN. All rights reserved.

217 Figure 4. The insulin signaling pathway obtained from the Ingenuity Pathway Analysis (IPA)  
218 program. Genes with a damaging amino acid substitution are colored in magenta. Possible  
219 downstream damaging effects of these genes were visualized using the Molecule Activity  
220 Predictor (MAP) tool in IPA (see prediction legend).

221

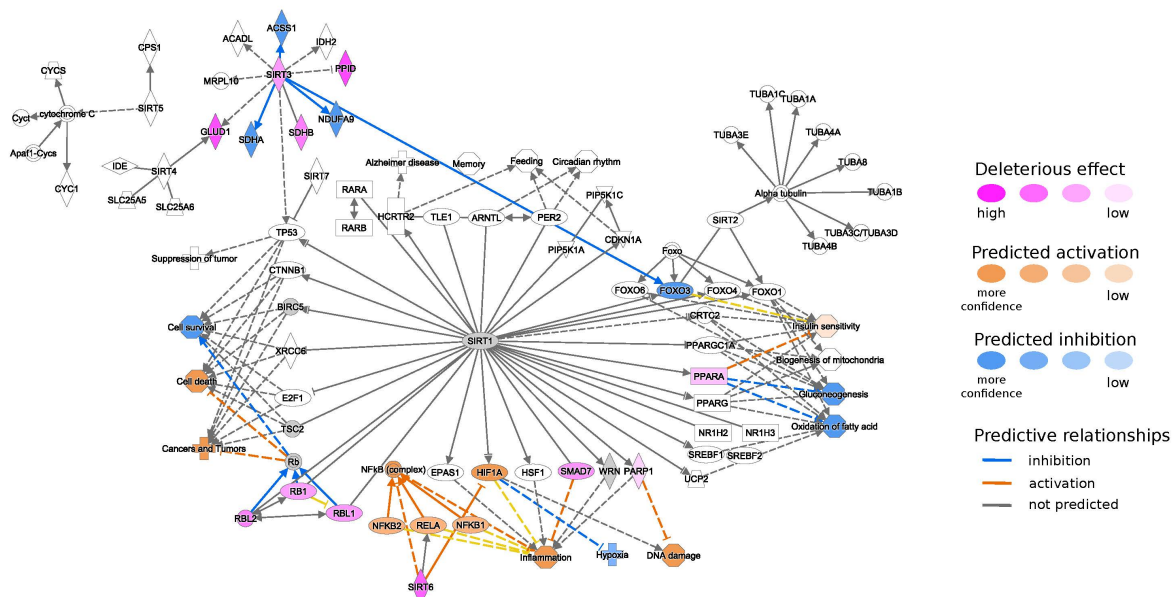

222

© 2000-2019 QIAGEN. All rights reserved.

223 Figure 5. The SIRT signaling pathway obtained from the Ingenuity Pathway Analysis (IPA)  
224 program. Genes with a damaging amino acid substitution are colored in magenta. Possible

225 downstream damaging effects of these genes were visualized using the Molecule Activity  
 226 Predictor (MAP) tool in IPA (see prediction legend).

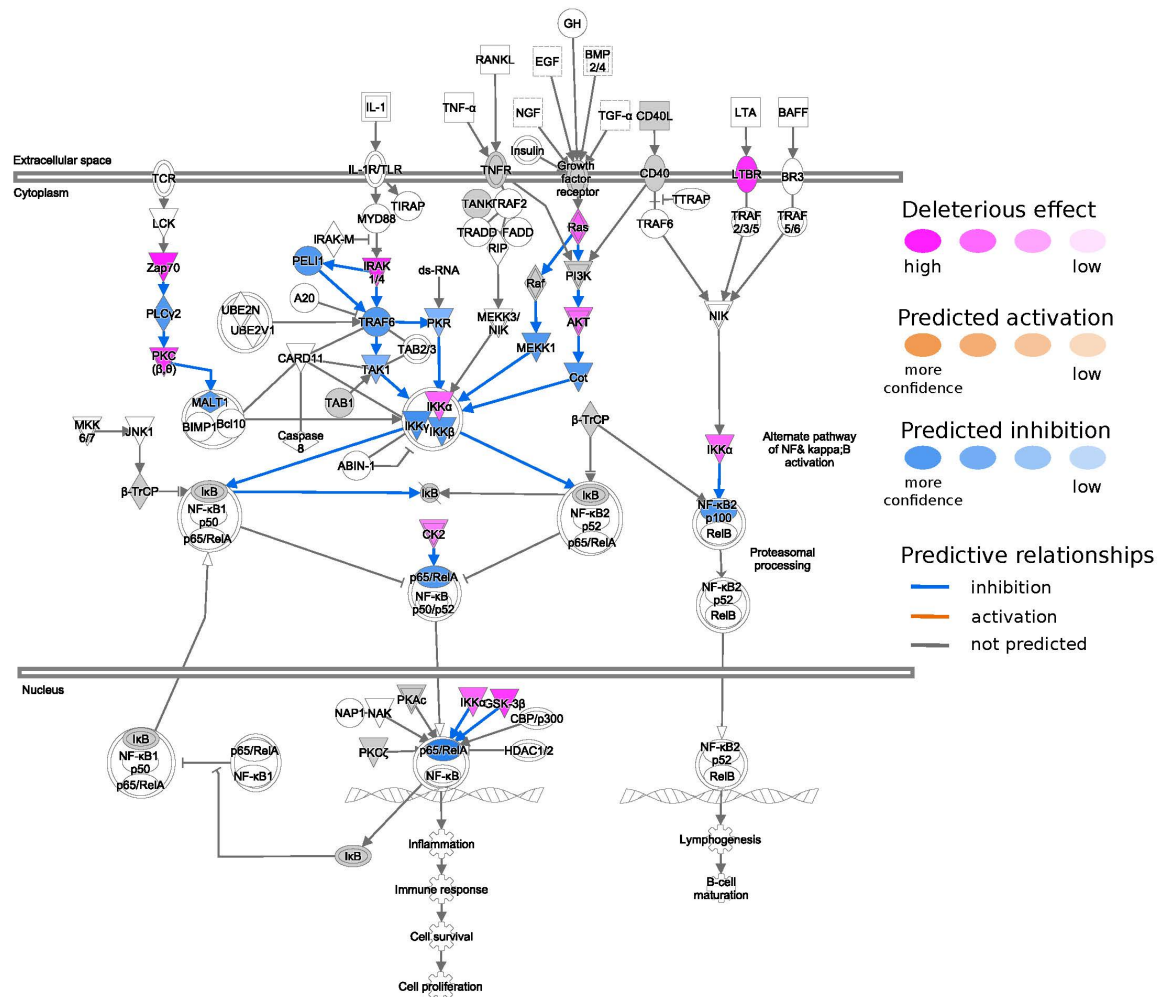

227 © 2000-2019 QIAGEN. All rights reserved.  
 228 Figure 6. The NF-κB signaling pathway obtained for Ingenuity Pathway Analysis (IPA) program.  
 229 Genes with a damaging amino acid substitution are colored in magenta. Possible downstream  
 230 damaging effects of these genes were visualized using the Molecule Activity Predictor (MAP)  
 231 tool in IPA (see prediction legend).

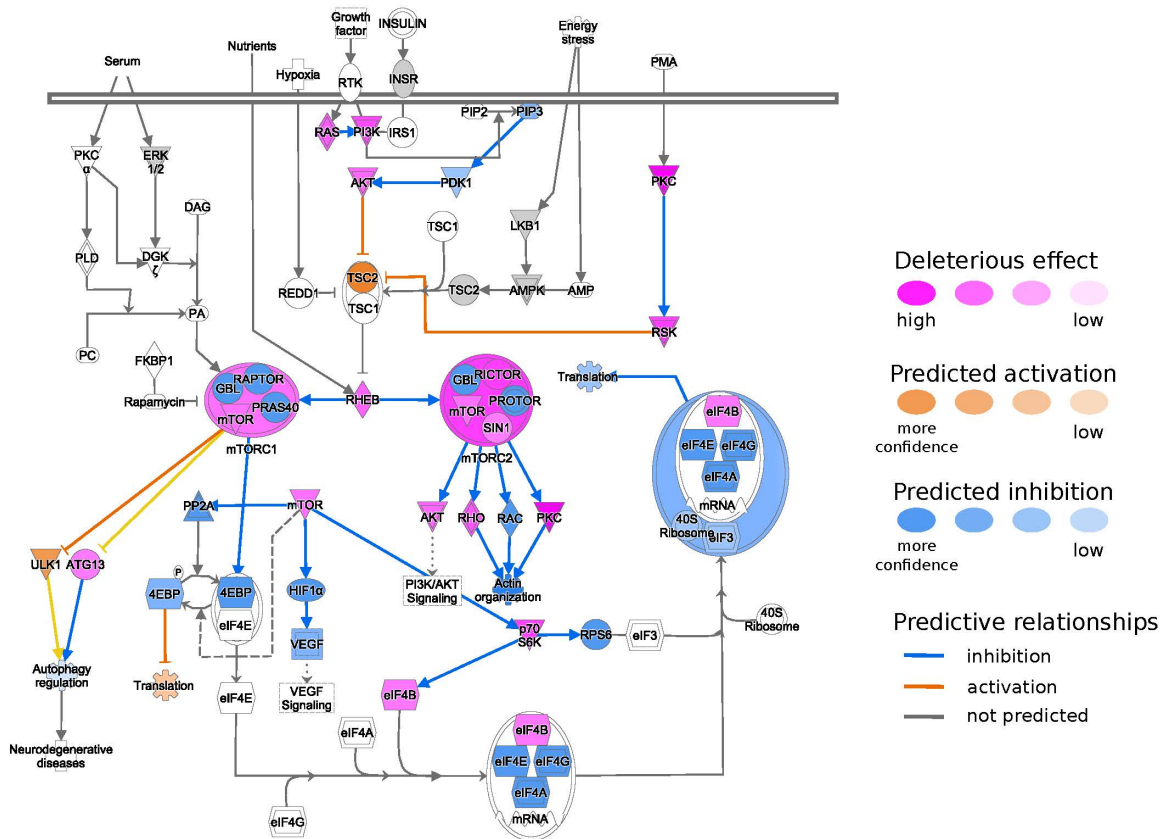

232 © 2000-2019 QIAGEN. All rights reserved.

233 Figure 7. The mTOR signaling pathway obtained for Ingenuity Pathway Analysis (IPA) program.  
 234 Genes with a damaging amino acid substitution are colored in magenta. Possible downstream  
 235 damaging effects of these genes were visualized using the Molecule Activity Predictor (MAP)  
 236 tool in IPA (see prediction legend).

237

## 238 Discussion

239 Here we took a targeted approach to identify positive selected genes in cetacean  
 240 nutrient sensing pathways. This allowed us to better understand how combined changes  
 241 might be focused on particular functions within these pathways and what the consequences  
 242 of these changes might be for the way by which energy metabolism in cetaceans may differ  
 243 from their terrestrial counterparts. These pathways have signaling cascades in common with  
 244 hormones such as insulin and are linked with the release of hormones from adipose tissue  
 245 (e.g. leptin). Our results indicate that genes involved in the insulin signaling pathway, the  
 246 mTOR, SIRT and NF- $\kappa$ B signaling pathway were significantly positively selected. These

247 pathways have profound effects on metabolism and the maintenance of energy reserves. In  
248 terrestrial mammals, adipose tissue mass is related to metabolic fitness and expansion can  
249 lead to inflammation triggering metabolic disfunctions and diseases (e.g. obesity, metabolic  
250 syndrome, insulin resistance). The positive selection of genes related to glucose metabolism  
251 and inflammation suggest that these genes may have been positively selected to adapt to a  
252 glucose-poor diet and that fat deposits signaling may not be as limited by inflammation,  
253 metabolic dysfunctions (e.g. insulin resistance) and reproduction. Understanding these  
254 adaptations can help us manage conservation threats that perturb the environmental  
255 nutrient levels of cetaceans (National Academies of Sciences, Engineering, 2017).

256 Cetaceans have a diet with a high fat and protein content and is almost devoid of  
257 carbohydrates (Wells et al., 2013). Hence pathways regulating carbohydrate and glucose  
258 metabolism would have been under selective pressure as these species underwent a shift in  
259 substrate utilization. Genes related to the control of food intake, glycerol uptake and glucose  
260 metabolism were found to be under positive selective pressure in dolphins (McGowen,  
261 Grossman, & Wildman, 2012). A high glucose transport may be needed via erythrocytes to  
262 deliver glucose to specific brain regions under normal or physiological stress conditions (e.g.  
263 hypoxia while diving) (Craik, Young, & Cheeseman, 1998). We found positive selections in the  
264 insulin signaling pathway which are consistent with this hypothesis. In fasted Northern  
265 elephant seals components of the insulin signaling pathway were reduced including glucose  
266 transport (GLUT4), phosphatidylinositol 3-kinase (PI3K) and phosphorylated insulin receptor  
267 substrate 1 (IRS1) (Viscarra, Vázquez-Medina, Crocker, & Ortiz, 2011). In our study, both PI3K  
268 and IRS1 genes were estimated to be under positive selection but not GLUT4.-Elephant seals  
269 are also insulin resistant (Viscarra et al., 2011) and hence may share common evolutionary  
270 selection of those mechanisms with cetaceans. We indeed identified deleterious changes to

271 the insulin signaling pathway, including the Akt protein signaling kinase (Akt) and PI3K.  
272 Damage to this pathway in various tissues has been linked to insulin resistance (Huang, Liu,  
273 Guo, & Su, 2018). The three Akt isoforms have differential physiological functions but loss of  
274 function in one isoform is compensated by another. Both Akt2<sup>-/-</sup> and Akt3<sup>-/-</sup> mice exhibit  
275 severe glucose and insulin resistance (Dummler et al., 2006). Interestingly the Akt  
276 phosphorylation at Ser473, which is required for its full activation, is accomplished by  
277 mTORC2 (Oh & Jacinto, 2011; Sarbassov, Guertin, Ali, & Sabatini, 2005). Both mTORC1 and  
278 mTORC2 were positively selected in the cetacean lineage to a point where we cannot expect  
279 them to function in the same way as in terrestrial mammals. In addition to PI3K/AKT signaling,  
280 PPAR $\alpha$  was also positively selected. Activation of the PPAR $\alpha$  isoform leads to improved lipid  
281 and carbohydrate profile and to reduced inflammation (Moller & Berger, 2003). It's anti-  
282 inflammatory properties have been linked to the suppression of NF- $\kappa$ B (Fuentes, Guzmán-  
283 Jofre, Moore-Carrasco, & Palomo, 2013). However, PPAR $\alpha$  is predominantly involved in  
284 cellular uptake, activation and  $\beta$ -oxidation of fatty acids (Moller & Berger, 2003). PPAR $\alpha$ <sup>-/-</sup>  
285 mice exposed to long-term high fat diet remained normoglycemic and normoinsulinemic  
286 despite having high adiposity while the wild type developed hyperinsulemia. In addition,  
287 glucose and insulin tolerance test indicated that high-fat-fed wild type developed insulin  
288 resistance over time while the PPAR $\alpha$ <sup>-/-</sup> remained unchanged (Guerre-Millo et al., 2001).  
289 Hence in absence of PPAR $\alpha$ , the increase in adiposity as a result of a high fat diet does not  
290 lead to insulin resistance. Interestingly, when dolphins were fed a big meal of fish, they do  
291 show signs of insulin resistant (Venn-Watson et al., 2011). However, when just fed dextrose  
292 and water they showed an insulin-deficient response (S. Venn-Watson et al., 2013). This  
293 response to glucose is similar to the GTT test of the PPAR $\alpha$ <sup>-/-</sup> mice. Hence key genes such as  
294 PPAR $\alpha$ , AKT and PI3K in the insulin signaling pathway may be positively selected as an



295 evolutionary driver for insulin resistance and to switch between type 2 and type 1 diabetes  
296 like states (S. Venn-Watson, 2014).

297 Maintaining adiposity can have negative consequences for survival in terrestrial  
298 mammals. We know that a large volume of adipose tissue triggers inflammatory responses in  
299 a range of species and can lead to metabolic dysfunctions at a physiological level (e.g. insulin  
300 resistance) (Mantovani, Sozzani, Locati, Allavena, & Sica, 2002). NF- $\kappa$ B is involved in the  
301 molecular signaling of hypoxia during adipose tissue expansion and triggers these  
302 inflammatory responses (Ye, Gao, Yin, & He, 2007). As the inflammatory function of NF- $\kappa$ B is  
303 linked to fat mass, the high level of adiposity in cetaceans would lead to chronic inflammation.  
304 The thickened blubber of cetaceans is a result of the secondary adaptation to life in water and  
305 hence selective pressure in this pathway may be a way to reduce intrinsic tissue inflammation.  
306 Here we found that key genes in the NF- $\kappa$ B signaling pathway were positively selected  
307 inhibitor of nuclear factor kappa B kinase subunit beta (IKK $\beta$ ) and IKK $\alpha$ . Mice that have the  
308 inflammatory pathway of NF- $\kappa$ B disabled (IKK $\beta$  knockout) are more insulin sensitive and are  
309 partially protected from high fat diet induced glucose intolerance and hyperinsulinemia  
310 (Arkan et al., 2005). In addition, the gene regulation of receptor interacting serine/threonine  
311 kinase 1 (RIPK1) was also positively selected and its associated amino acid sequence changed  
312 drastically compared to the outgroups. RIPK1 has a downstream effect on IKK $\alpha$  and IKK $\beta$ , and  
313 hence may influence the signaling in this pathway. The IKK complex has a NF- $\kappa$ B independent  
314 role in the protection of cells from RIPK-dependent death downstream from the tumor  
315 necrosis factor receptor (TNFR1) (Dondelinger et al., 2015). Cetaceans do have a fully  
316 functioning immune and endocrine responses and these are highly dependent on the  
317 environment (e.g. pathogens, pollution and noise) (Fair & Becker, 2000; Fair et al., 2017). For  
318 example transcripts encoding pro-inflammatory cytokines were significantly lower in

319 managed-care dolphins compared to free-ranging dolphins (Fair et al., 2017). A greater  
320 understanding of tissue specific inflammatory responses is needed and may provide valuable  
321 insights into how inflammatory responses are regulated in regards to the high adiposity in  
322 these healthy but “obese” mammals, during periods of diving and environmental fluctuation.

323 Finally, most components in the mTOR pathway were positively selected including  
324 both of its complexes (mTORC1 and mTORC2). mTORC1 regulates processes related to growth  
325 and differentiation while mTORC2 plays a regulatory role in the insulin cascade (Lamming et  
326 al., 2012). mTOR is primarily involved in immune response and sensing nutrient availability.  
327 As elevated mTOR leads to increased hepatic gluconeogenesis and reduced glucose uptake  
328 by muscles, it is maybe not surprising that several components in the mTOR pathway are  
329 significantly changed in cetaceans. Especially as mTOR is involved in nutrient sensing. As  
330 dolphins are able to switch between type 2 and type 1 diabetes like states based on their meal  
331 content (S. Venn-Watson, 2014), specific components both up- and down- stream from mTOR  
332 may be positively selected to facilitate such a response. In rats, a ketogenic diet (low in  
333 carbohydrates) are able to reduce mTOR expression and likely via AKT (McDaniel, Rensing,  
334 Thio, Yamada, & Wong, 2011). Rodents fed on a keto diet also exhibit lower insulin levels,  
335 which likely induce a decreased mTOR signaling (Thio, Erbayat-Altay, Rensing, & Yamada,  
336 2006). Cetaceans have a diet similar to ketogenic diet with a high fat and protein content and  
337 almost devoid of carbohydrates (Wells et al., 2013). Hence, to optimise the uptake of the  
338 limited available glucose in the diet, aspects in the insulin/mTOR pathway may be altered to  
339 create insulin resistance.

340

## 341 **Conclusion**

342           Taken together, our findings provide novel insights into the role of the insulin, mTOR  
343 and NF- $\kappa$ B signaling pathways in the adaptation of cetaceans to an aquatic life. They point to  
344 adaptations likely to reduce the health consequences of adiposity. These results mean that  
345 condition measures based on adiposity must be used with caution. Indeed, lower bounds of  
346 adiposity are influenced by thermoregulatory requirements and upper bounds of adiposity  
347 will not be influenced by inflammatory response in the same way as it is in terrestrial  
348 mammals.

349           Further work is needed to unravel the complex signaling mechanisms of adipose tissue  
350 in cetacean energy metabolism and to determine the effects of these signaling molecules on  
351 whole body functioning including appetite regulation, energy balance, and inflammatory  
352 responses. Understanding these adaptations can help us manage conservation threats that  
353 perturb the environmental nutrient levels of cetaceans (National Academies of Sciences,  
354 Engineering, 2017).

## 355 **Authors' Contributions**

356 DL, JS and DD designed the study. DD wrote the manuscript and performed the pathway level  
357 analyses and interpretation with input from DL. MW performed the gene-level analyses with  
358 input from AD and JS. DD, MW and DL interpreted the data. All authors read and commented  
359 on the manuscript.

## 360 **Acknowledgements**

361 This work was funded by US ONR grant award number N000141512377. The authors  
362 acknowledge the support of the Maxwell computer cluster funded by the University of  
363 Aberdeen.

364 **Data accessibility**

365 Data will become openly available after uploading on Dryad.

366 **References**

367 Arkan, M. C., Hevener, A. L., Greten, F. R., Maeda, S., Li, Z.-W., Long, J. M., ... Karin, M.

368 (2005). IKK-beta links inflammation to obesity-induced insulin resistance. *Nature*

369 *Medicine*, 11(2), 191–8. doi:10.1038/nm1185

370 Ball, H. C., Londrville, R. L., Prokop, J. W., George, J. C., Suydam, R. S., Vinyard, C., ... Duff, R.

371 J. (2017). Beyond thermoregulation: metabolic function of cetacean blubber in

372 migrating bowhead and beluga whales. *Journal of Comparative Physiology B*, 187(1),

373 235–252. doi:10.1007/s00360-016-1029-6

374 Benjamini, Y., & Hochberg, Y. (1995). Controlling the false discovery rate: a practical and

375 powerful approach to multiple testing. *Journal of the Royal Statistical Society. Series B*

376 ..., 57(1), 289–300. doi:10.2307/2346101

377 Capella-Gutiérrez, S., Silla-Martínez, J. M., & Gabaldón, T. (2009). trimAl: A tool for

378 automated alignment trimming in large-scale phylogenetic analyses. *Bioinformatics*.

379 doi:10.1093/bioinformatics/btp348

380 Chantranupong, L., Wolfson, R. L., & Sabatini, D. M. (2015). Nutrient-sensing mechanisms

381 across evolution. *Cell*, 161(1), 67–83. doi:10.1016/j.cell.2015.02.041

382 Choi, Y., Sims, G. E., Murphy, S., Miller, J. R., & Chan, A. P. (2012). Predicting the Functional

383 Effect of Amino Acid Substitutions and Indels. *PLoS ONE*, 7(10).

384 doi:10.1371/journal.pone.0046688

385 Craik, J. D., Young, J. D., & Cheeseman, C. I. (1998). GLUT-1 mediation of rapid glucose

- 386 transport in dolphin (*Tursiops truncatus*) red blood cells. *The American Journal of*  
387 *Physiology*, 274(1 Pt 2), R112-9.
- 388 Dondelinger, Y., Jouan-Lanhouet, S., Divert, T., Theatre, E., Bertin, J., Gough, P. J., ...  
389 Bertrand, M. J. M. (2015). NF- $\kappa$ B-Independent Role of IKK $\alpha$ /IKK $\beta$  in Preventing RIPK1  
390 Kinase-Dependent Apoptotic and Necroptotic Cell Death during TNF Signaling.  
391 *Molecular Cell*, 60(1), 63–76. doi:10.1016/j.molcel.2015.07.032
- 392 Dummler, B., Tschopp, O., Hynx, D., Yang, Z.-Z., Dirnhofer, S., & Hemmings, B. A. (2006). Life  
393 with a single isoform of Akt: mice lacking Akt2 and Akt3 are viable but display impaired  
394 glucose homeostasis and growth deficiencies. *Molecular and Cellular Biology*, 26(21),  
395 8042–51. doi:10.1128/MCB.00722-06
- 396 Duncan, R. E., Ahmadian, M., Jaworski, K., Sarkadi-Nagy, E., & Sul, H. S. (2007). Regulation of  
397 lipolysis in adipocytes. *Annual Review of Nutrition*, 27, 79–101.  
398 doi:10.1146/annurev.nutr.27.061406.093734
- 399 Fair, P. A., & Becker, P. R. (2000). Review of stress in marine mammals. *Journal of Aquatic*  
400 *Ecosystem Stress and Recovery*, 7(4), 335–354. doi:10.1023/A:1009968113079
- 401 Fair, P. A., Schaefer, A. M., Houser, D. S., Bossart, G. D., Romano, T. A., Champagne, C. D., ...  
402 Reif, J. S. (2017). The environment as a driver of immune and endocrine responses in  
403 dolphins (*Tursiops truncatus*). *PLoS One*, 12(5), e0176202.  
404 doi:10.1371/journal.pone.0176202
- 405 Fuentes, E., Guzmán-Jofre, L., Moore-Carrasco, R., & Palomo, I. (2013, December 1). Role of  
406 PPARs in inflammatory processes associated with metabolic syndrome (Review).  
407 *Molecular Medicine Reports*. Spandidos Publications. doi:10.3892/mmr.2013.1714

- 408 Guerre-Millo, M., Rouault, C., Poulain, P., Andre, J., Poitout, V., Peters, J. M., ... Staels, B.  
409 (2001). PPAR-/-Null Mice Are Protected From High-Fat Diet-Induced Insulin Resistance.  
410 *Diabetes*, 50(12), 2809–2814. doi:10.2337/diabetes.50.12.2809
- 411 Huang, X., Liu, G., Guo, J., & Su, Z. (2018). The PI3K/AKT pathway in obesity and type 2  
412 diabetes. *International Journal of Biological Sciences*, 14(11), 1483–1496.  
413 doi:10.7150/ijbs.27173
- 414 Lamming, D. W., Ye, L., Katajisto, P., Goncalves, M. D., Saitoh, M., Stevens, D. M., ... Sancar,  
415 Y. (2012). Rapamycin-induced insulin resistance is mediated by mTORC2 loss and  
416 uncoupled from longevity. *Science*, 335, 1638–43. doi:10.1126/science.1215135
- 417 Mantovani, A., Sozzani, S., Locati, M., Allavena, P., & Sica, A. (2002). Macrophage  
418 polarization: tumor-associated macrophages as a paradigm for polarized M2  
419 mononuclear phagocytes. *Trends in Immunology*, 23(11), 549–555. doi:10.1016/S1471-  
420 4906(02)02302-5
- 421 McDaniel, S. S., Rensing, N. R., Thio, L. L., Yamada, K. A., & Wong, M. (2011). The ketogenic  
422 diet inhibits the mammalian target of rapamycin (mTOR) pathway. *Epilepsia*, 52(3), e7-  
423 11. doi:10.1111/j.1528-1167.2011.02981.x
- 424 McGowen, M. R., Grossman, L. I., & Wildman, D. E. (2012). Dolphin genome provides  
425 evidence for adaptive evolution of nervous system genes and a molecular rate  
426 slowdown. *Proceedings of the Royal Society B: Biological Sciences*, 279(1743), 3643–  
427 3651. doi:10.1098/rspb.2012.0869
- 428 Moller, D. E., & Berger, J. P. (2003). Role of PPARs in the regulation of obesity-related insulin  
429 sensitivity and inflammation. *International Journal of Obesity*, 27(S3), S17–S21.

- 430           doi:10.1038/sj.ijo.0802494
- 431   Nakagawa, T., & Guarente, L. (2011). Sirtuins at a glance. *Journal of Cell Science*, *124*(6),  
432           833–838. doi:10.1242/jcs.081067
- 433   National Academies of Sciences, Engineering, and M. (2017). *Approaches to Understanding*  
434           *the Cumulative Effects of Stressors on Marine Mammals*. Washington, D.C.: National  
435           Academies Press. doi:10.17226/23479
- 436   Nery, M. F., González, D. J., & Opazo, J. C. (2013). How to Make a Dolphin: Molecular  
437           Signature of Positive Selection in Cetacean Genome. *PloS One*, *8*(6), e65491.  
438           doi:10.1371/journal.pone.0065491
- 439   Nguyen, L. T., Schmidt, H. A., Von Haeseler, A., & Minh, B. Q. (2015). IQ-TREE: A fast and  
440           effective stochastic algorithm for estimating maximum-likelihood phylogenies.  
441           *Molecular Biology and Evolution*. doi:10.1093/molbev/msu300
- 442   Oh, W. J., & Jacinto, E. (2011). mTOR complex 2 signaling and functions. *Cell Cycle*, *10*(14),  
443           2305–2316. doi:10.4161/cc.10.14.16586
- 444   Parry, D. A. (1949). The structure of whale blubber, and a discussion of its thermal  
445           properties. *The Quarterly Journal of Microscopical Science*, *90*(1), 13–25.
- 446   Pirota, E., Booth, C. G., Costa, D. P., Fleishman, E., Kraus, S. D., Lusseau, D., ... Harwood, J.  
447           (2018). Understanding the population consequences of disturbance. *Ecology and*  
448           *Evolution*. doi:10.1002/ece3.4458
- 449   R Core Team. (2014). *R: a language and environment for statistical computing*. Vienna,  
450           Austria. R Foundation for Statistical Computing. Vienna, Austria. Retrieved from  
451           <http://www.r-project.org/>

- 452 Ranwez, V., Douzery, E. J. P., Cambon, C., Chantret, N., & Delsuc, F. (2018). MACSE v2:  
453 Toolkit for the alignment of coding sequences accounting for frameshifts and stop  
454 codons. *Molecular Biology and Evolution*. doi:10.1093/molbev/msy159
- 455 Sarbassov, D. D., Guertin, D. A., Ali, S. M., & Sabatini, D. M. (2005). Phosphorylation and  
456 Regulation of Akt/PKB by the Rictor-mTOR Complex. *Science*, 307(5712), 1098–1101.  
457 doi:10.1126/science.1106148
- 458 Scholander, P. F., Walters, V., Hock, R., & Irving, L. (1950). Body insulation of some arctic and  
459 tropical mammals and birds. *The Biological Bulletin*, 99(2), 225–236.  
460 doi:10.2307/1538740
- 461 Slater, G. S. C., & Birney, E. (2005). Automated generation of heuristics for biological  
462 sequence comparison. *BMC Bioinformatics*. doi:10.1186/1471-2105-6-31
- 463 Thio, L. L., Erbayat-Altay, E., Rensing, N., & Yamada, K. A. (2006). Leptin Contributes to  
464 Slower Weight Gain in Juvenile Rodents on a Ketogenic Diet. *Pediatric Research*, 60(4),  
465 413–417. doi:10.1203/01.pdr.0000238244.54610.27
- 466 Vasseur, D. A., & Yodzis, P. (2004). The color of environmental noise. *Ecology*, 85(4), 1146–  
467 1152. doi:10.1890/02-3122
- 468 Venn-Watson, S. (2014). Dolphins and Diabetes: Applying One Health for Breakthrough  
469 Discoveries. *Frontiers in Endocrinology*, 5(DEC). doi:10.3389/fendo.2014.00227
- 470 Venn-Watson, S., Carlin, K., & Ridgway, S. (2011). Dolphins as animal models for type 2  
471 diabetes: Sustained, post-prandial hyperglycemia and hyperinsulinemia. *General and*  
472 *Comparative Endocrinology*, 170(1), 193–199. doi:10.1016/j.ygcen.2010.10.005
- 473 Venn-Watson, S. K., & Ridgway, S. H. (2007). Big brains and blood glucose: common ground



- 474 for diabetes mellitus in humans and healthy dolphins. *Comparative Medicine*, 57(4),  
475 390–5.
- 476 Venn-Watson, S., Smith, C. R., Stevenson, S., Parry, C., Daniels, R., Jensen, E., ... Wells, R.  
477 (2013). Blood-based indicators of insulin resistance and metabolic syndrome in  
478 bottlenose dolphins (*Tursiops truncatus*). *Frontiers in Endocrinology*, 4(OCT).  
479 doi:10.3389/fendo.2013.00136
- 480 Viscarra, J. a, Vázquez-Medina, J. P., Crocker, D. E., & Ortiz, R. M. (2011). Glut4 is  
481 upregulated despite decreased insulin signaling during prolonged fasting in northern  
482 elephant seal pups. *American Journal of Physiology. Regulatory, Integrative and*  
483 *Comparative Physiology*, 300, R150–R154. doi:10.1152/ajpregu.00478.2010
- 484 Wang, Z., Chen, Z., Xu, S., Ren, W., Zhou, K., & Yang, G. (2015). ‘Obesity’ is healthy for  
485 cetaceans? Evidence from pervasive positive selection in genes related to  
486 triacylglycerol metabolism. *Scientific Reports*, 5, 14187. doi:10.1038/srep14187
- 487 Wang, Z., Xu, S., Du, K., Huang, F., Chen, Z., Zhou, K., ... Yang, G. (2016). Evolution of  
488 Digestive Enzymes and RNASE1 Provides Insights into Dietary Switch of Cetaceans.  
489 *Molecular Biology and Evolution*, 33(12), 3144–3157. doi:10.1093/molbev/msw191
- 490 Wells, R. S., McHugh, K. A., Douglas, D. C., Shippee, S., McCabe, E. B., Barros, N. B., &  
491 Phillips, G. T. (2013). Evaluation of potential protective factors against metabolic  
492 syndrome in bottlenose dolphins: feeding and activity patterns of dolphins in sarasota  
493 bay, Florida. *Frontiers in Endocrinology*, 4, 139. doi:10.3389/fendo.2013.00139
- 494 Williams, T. M., Friedl, W. a, & Haun, J. E. (1993). The physiology of bottlenose dolphins  
495 (*Tursiops truncatus*): heart rate, metabolic rate and plasma lactate concentration

- 496 during exercise. *The Journal of Experimental Biology*, 179, 31–46.
- 497 Williams, T. M., Haun, J., Davis, R. W., Fuiman, L. A., & Kohin, S. (2001). A killer appetite:  
498 Metabolic consequences of carnivory in marine mammals. In *Comparative Biochemistry  
499 and Physiology - A Molecular and Integrative Physiology* (Vol. 129, pp. 785–796).  
500 doi:10.1016/S1095-6433(01)00347-6
- 501 Yang, Z. (2007). PAML 4: Phylogenetic analysis by maximum likelihood. *Molecular Biology  
502 and Evolution*, 24(8), 1586–1591. doi:10.1093/molbev/msm088
- 503 Ye, J., Gao, Z., Yin, J., & He, Q. (2007). Hypoxia is a potential risk factor for chronic  
504 inflammation and adiponectin reduction in adipose tissue of ob/ob and dietary obese  
505 mice. *American Journal of Physiology. Endocrinology and Metabolism*, 293(4), E1118-  
506 28. doi:10.1152/ajpendo.00435.2007
- 507 Zhang, C., Rabiee, M., Sayyari, E., & Mirarab, S. (2018). ASTRAL-III: Polynomial time species  
508 tree reconstruction from partially resolved gene trees. *BMC Bioinformatics*.  
509 doi:10.1186/s12859-018-2129-y
- 510 Zurano, J. P., Magalhães, F. M., Asato, A. E., Silva, G., Bidau, C. J., Mesquita, D. O., & Costa,  
511 G. C. (2019). Cetartiodactyla: Updating a time-calibrated molecular phylogeny.  
512 *Molecular Phylogenetics and Evolution*, 133, 256–262.  
513 doi:10.1016/J.YMPEV.2018.12.015
- 514

515 **Supplementary Figures**

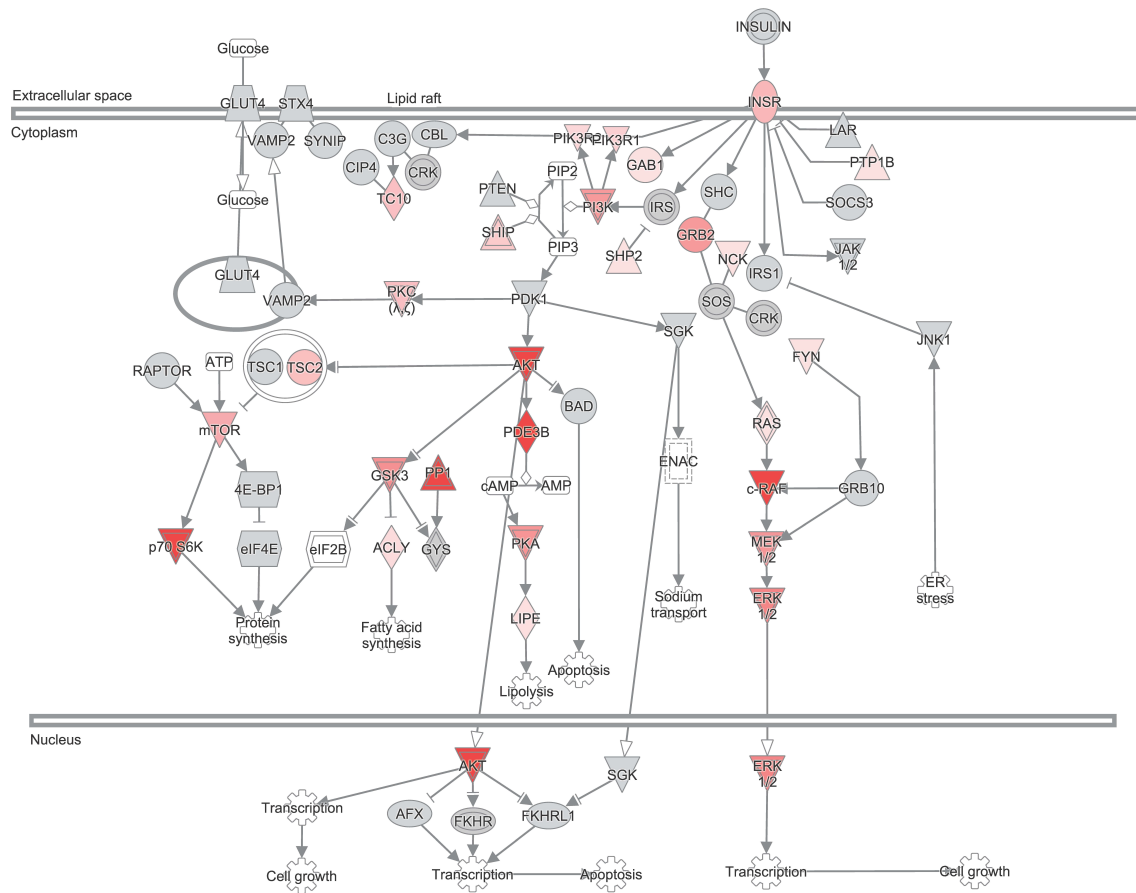

516 © 2000-2019 QIAGEN. All rights reserved.

517 Figure S1. The insulin signaling pathway obtained from Ingenuity Pathway Analysis (IPA)  
 518 program. Genes in the pathway are colored according to their corresponding  $\Delta L$  value  
 519 identified by the branch-site model. Intensity of the color is related to the strength of the  
 520 positive gene selection. Uncolored genes represent those genes with an adjusted p-value >  
 521 0.05.

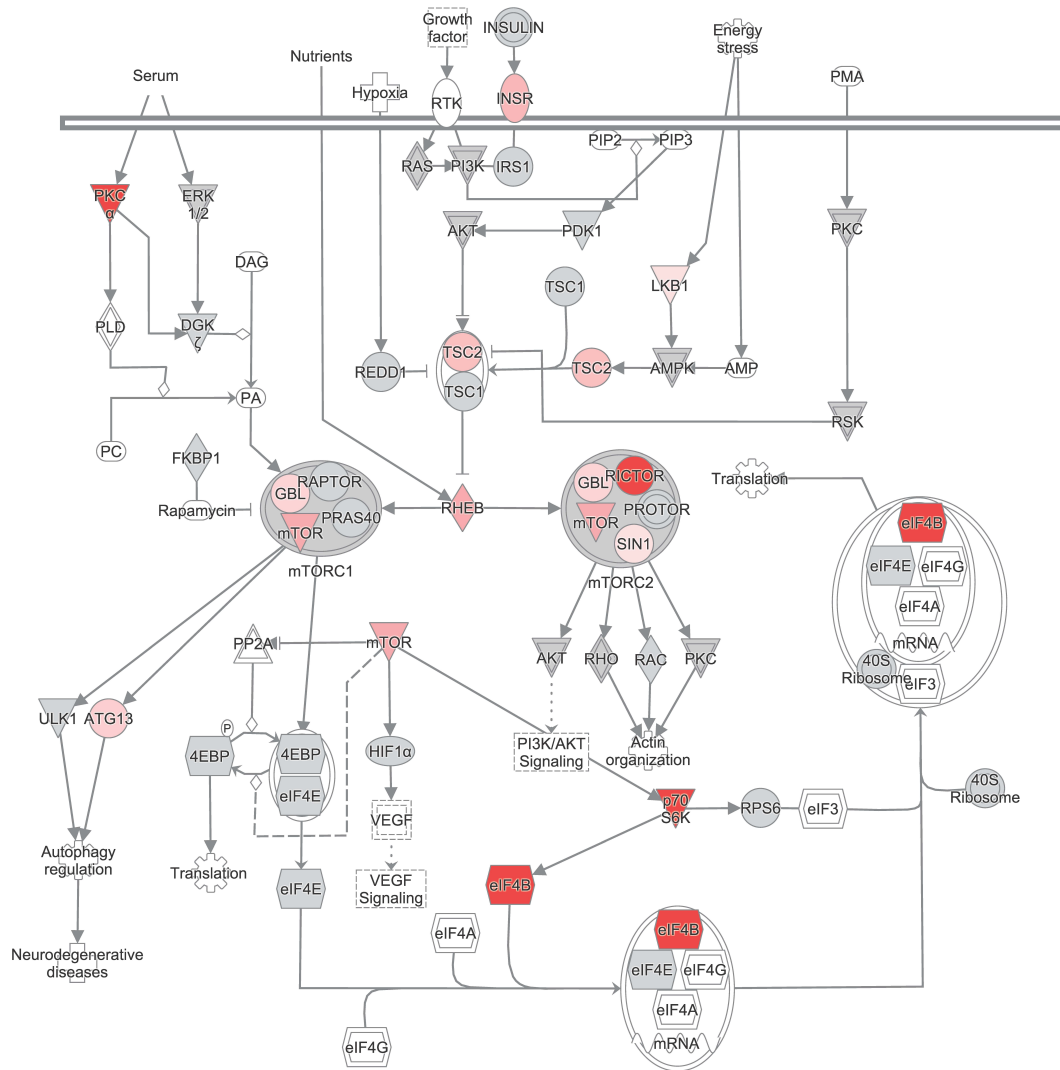

522 © 2000-2019 QIAGEN. All rights reserved.

523 Figure S2. The mTOR signaling pathway obtained for Ingenuity Pathway Analysis (IPA)  
 524 program. Genes in the pathway are colored according to their corresponding  $\Delta L$  value  
 525 identified by the branch-site model. Intensity of the color is related to the strength of the  
 526 positive gene selection. Uncolored genes represent those genes with an adjusted p-value >  
 527 0.05.

528

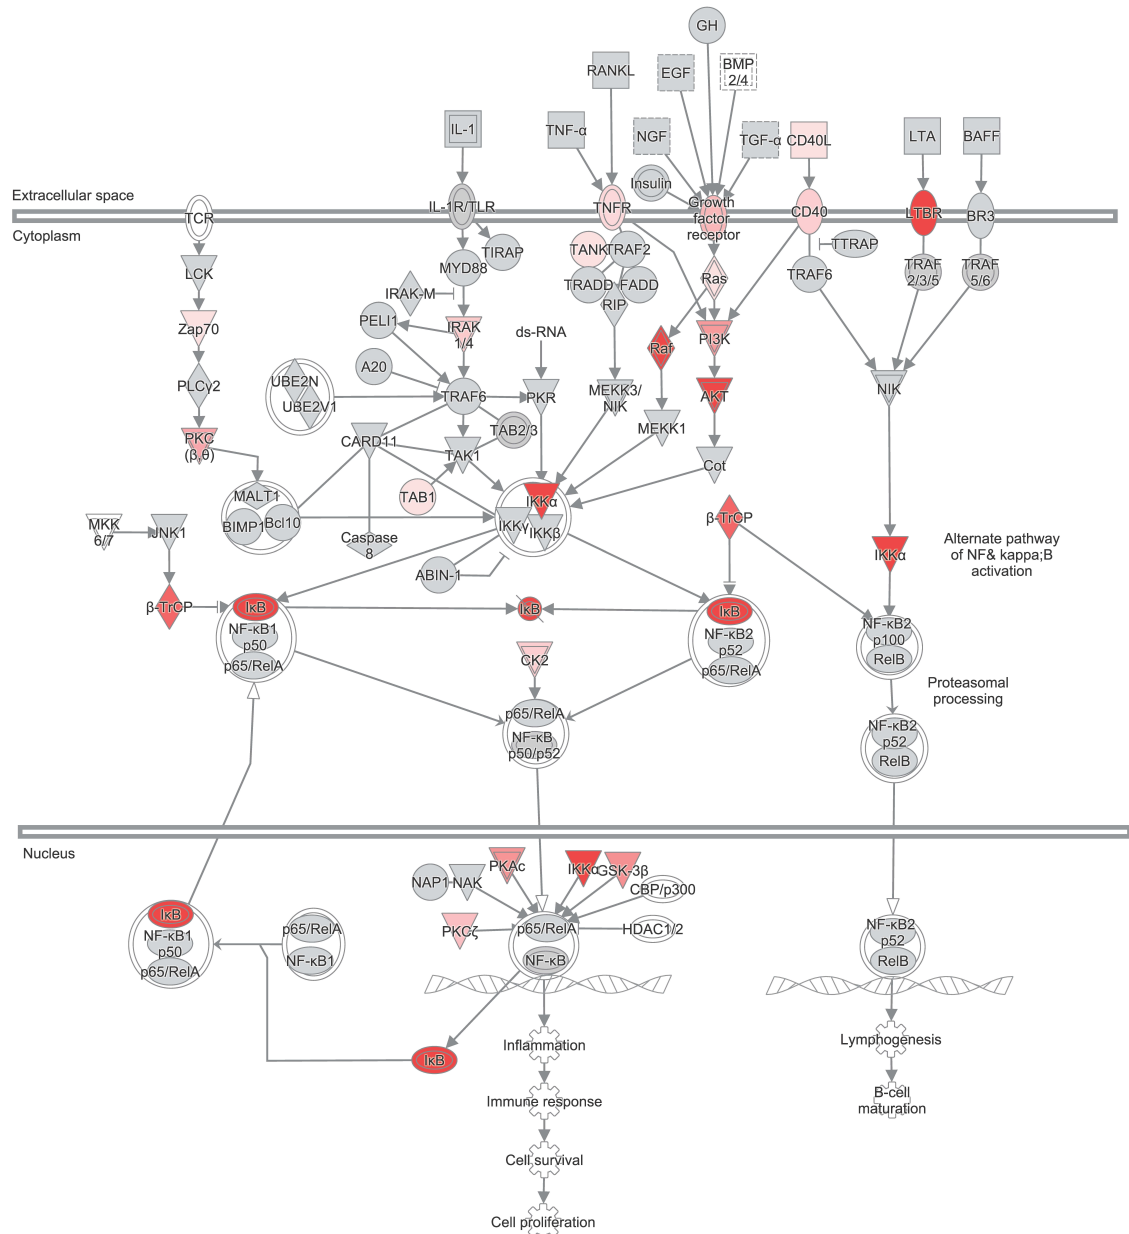

529

© 2000-2019 QIAGEN. All rights reserved.

530 Figure S3. The NF-κB signaling pathway obtained for Ingenuity Pathway Analysis (IPA)  
 531 program. Genes in the pathway are colored according to their corresponding 2ΔL value  
 532 identified by the branch-site model. Intensity of the color is related to the strength of the  
 533 positive gene selection.

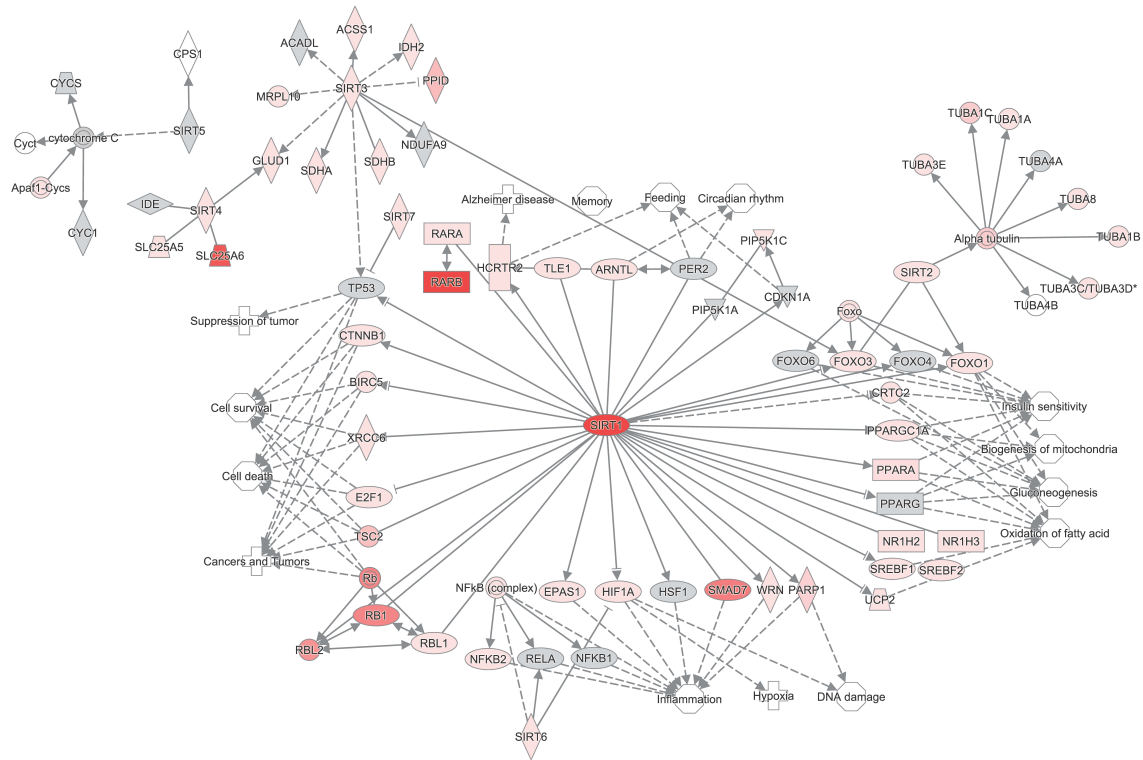

534

© 2000-2019 QIAGEN. All rights reserved.

535 Figure S4. The SIRT signaling pathway created in the Ingenuity Pathway Analysis (IPA)  
536 program. Genes in the pathway are colored according to their corresponding  $\Delta L$  value  
537 identified by the branch-site model. Intensity of the color is related to the strength of the  
538 positive gene selection.

539

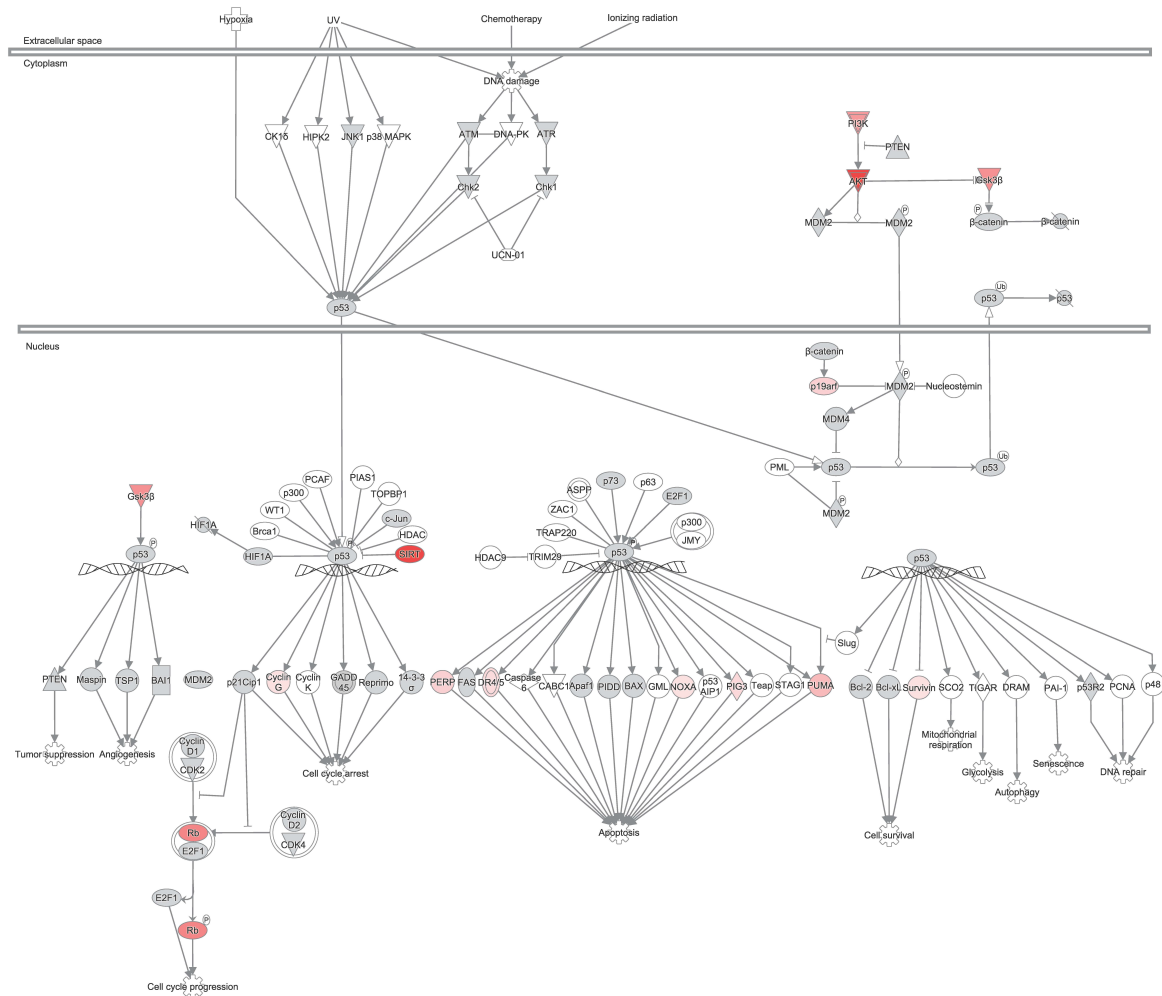

540

© 2000-2019 QIAGEN. All rights reserved.

541 Figure S5. The p53 signaling pathway obtained for Ingenuity Pathway Analysis (IPA) program.  
 542 Genes in the pathway are colored according to their corresponding  $2\Delta\Delta$  value identified by  
 543 the branch-site model. Intensity of the color is related to the strength of the positive gene  
 544 selection.

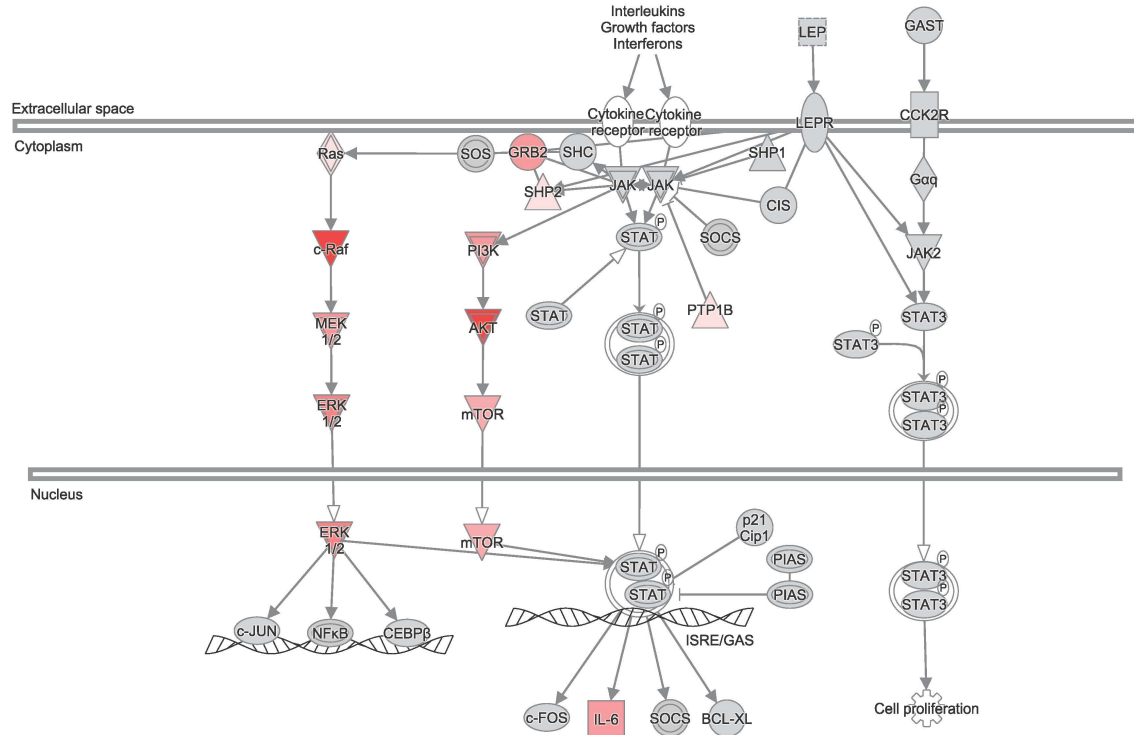

545 © 2000-2019 QIAGEN. All rights reserved.

546 Figure S6. The leptin signaling pathway obtained for Ingenuity Pathway Analysis (IPA)  
 547 program. Genes in the pathway are colored according to their corresponding  $\Delta L$  value  
 548 identified by the branch-site model. Intensity of the color is related to the strength of the  
 549 positive gene selection.

550

## 551 Supplementary Tables

**Table S1.** The genome assemblies of human, mouse, 16 cetacean species and 37 artiodactyl species downloaded from NCBI.

| Group        | Species                      | NCBI accession  |
|--------------|------------------------------|-----------------|
| Artiodactyla | <i>Ammotragus lervia</i>     | GCA_002201775.1 |
| Artiodactyla | <i>Antilocapra americana</i> | GCA_004027515.1 |
| Artiodactyla | <i>Axis porcinus</i>         | GCA_003798545.1 |
| Artiodactyla | <i>Beatragus hunteri</i>     | GCA_004027495.1 |
| Artiodactyla | <i>Bison bison</i>           | GCA_000754665.1 |
| Artiodactyla | <i>Bos indicus</i>           | GCA_000247795.2 |
| Artiodactyla | <i>Bos mutus</i>             | GCA_000298355.1 |
| Artiodactyla | <i>Bos taurus</i>            | GCA_002263795.2 |
| Artiodactyla | <i>Bubalus bubalis</i>       | GCA_003121395.1 |
| Artiodactyla | <i>Camelus bactrianus</i>    | GCA_000767855.1 |
| Artiodactyla | <i>Camelus dromedarius</i>   | GCA_000767585.1 |
| Artiodactyla | <i>Camelus ferus</i>         | GCA_000311805.2 |



|              |                                    |                  |
|--------------|------------------------------------|------------------|
| Artiodactyla | <i>Capra aegagrus</i>              | GCA_000978405.1  |
| Artiodactyla | <i>Capra hircus</i>                | GCA_001704415.1  |
| Artiodactyla | <i>Capra sibirica</i>              | GCA_003182615.2  |
| Artiodactyla | <i>Capreolus capreolus</i>         | GCA_000751575.1  |
| Artiodactyla | <i>Catagonus wagneri</i>           | GCA_004024745.1  |
| Artiodactyla | <i>Cervus elaphus</i>              | GCA_002197005.1  |
| Artiodactyla | <i>Elaphurus davidianus</i>        | GCA_002443075.1  |
| Artiodactyla | <i>Giraffa tippelskirchi</i>       | GCA_001651235.1  |
| Artiodactyla | <i>Hemitragus hylocrius</i>        | GCA_004026825.1  |
| Artiodactyla | <i>Hippopotamus amphibius</i>      | GCA_002995585.1  |
| Artiodactyla | <i>Moschus moschiferus</i>         | GCA_004024705.1  |
| Artiodactyla | <i>Odocoileus hemionus</i>         | GCA_004115125.1  |
| Artiodactyla | <i>Odocoileus virginianus</i>      | GCA_002102435.1  |
| Artiodactyla | <i>Okapia johnstoni</i>            | GCA_001660835.1  |
| Artiodactyla | <i>Oryx gazella</i>                | GCA_003945745.1  |
| Artiodactyla | <i>Ovis ammon</i>                  | GCA_003121645.1  |
| Artiodactyla | <i>Ovis aries</i>                  | GCA_002742125.1  |
| Artiodactyla | <i>Ovis canadensis</i>             | GCA_004026945.1  |
| Artiodactyla | <i>Pantholops hodgsonii</i>        | GCA_000400835.1  |
| Artiodactyla | <i>Pseudois nayaur</i>             | GCA_003182575.1  |
| Artiodactyla | <i>Rangifer tarandus</i>           | GCA_004026565.1  |
| Artiodactyla | <i>Saiga tatarica</i>              | GCA_004024985.1  |
| Artiodactyla | <i>Sus scrofa</i>                  | GCA_000003025.6  |
| Artiodactyla | <i>Tragulid javanicus</i>          | GCA_004024965.1  |
| Artiodactyla | <i>Vicugna pacos</i>               | GCA_000164845.3  |
| Cetacea      | <i>Balaenoptera acutorostrata</i>  | GCA_000493695.1  |
| Cetacea      | <i>Balaenoptera bonaerensis</i>    | GCA_000978805.1  |
| Cetacea      | <i>Delphinapterus leucas</i>       | GCA_002288925.2  |
| Cetacea      | <i>Eschrichtius robustus</i>       | GCA_002189225.1  |
| Cetacea      | <i>Lagenorhynchus obliquidens</i>  | GCA_003676395.1  |
| Cetacea      | <i>Lipotes vexillifer</i>          | GCA_000442215.1  |
| Cetacea      | <i>Megaptera novaeangliae</i>      | GCA_004329385.1  |
| Cetacea      | <i>Mesoplodon bidens</i>           | GCA_004027085.1  |
| Cetacea      | <i>Monodon monoceros</i>           | GCA_004027045.1  |
| Cetacea      | <i>Neophocaena asiaeorientalis</i> | GCA_003031525.1  |
| Cetacea      | <i>Orcinus orca</i>                | GCA_000331955.2  |
| Cetacea      | <i>Phocoena phocoena</i>           | GCA_003071005.1  |
| Cetacea      | <i>Physeter catodon</i>            | GCA_002837175.2  |
| Cetacea      | <i>Sousa chinensis</i>             | GCA_003521335.2  |
| Cetacea      | <i>Tursiops aduncus</i>            | GCA_003227395.1  |
| Cetacea      | <i>Tursiops truncatus</i>          | GCA_001922835.1  |
| Outgroup     | <i>Homo sapiens</i>                | GCA_000001405.27 |
| Outgroup     | <i>Mus musculus</i>                | GCA_000001635.8  |

552

553

**Table S2.** Insulin signaling pathway overlaid with the likelihood-ratio test statistics ( $2\Delta L$ ) between the positive and neutral branch-models as a measure to visualize a pathway effect.

| <b>Symbol</b>        | <b><math>2\Delta L</math></b> | <b><i>p</i>-value</b> |
|----------------------|-------------------------------|-----------------------|
| 4E-BP1               | 0.000                         | 1.000                 |
| ACLY                 | 17.800                        | <0.001                |
| AFX                  | 0.000                         | 1.000                 |
| AKT                  |                               |                       |
| AMP                  |                               |                       |
| Apoptosis            |                               |                       |
| ATP                  |                               |                       |
| BAD                  | 1.359                         | 0.566                 |
| c-RAF                | 105.387                       | <0.001                |
| C3G                  | 0.156                         | 1.000                 |
| cAMP                 |                               |                       |
| CBL                  | 0.000                         | 1.000                 |
| Cell growth          |                               |                       |
| CIP4                 | 0.003                         | 1.000                 |
| CRK                  |                               |                       |
| eIF2B                |                               |                       |
| eIF4E                | 0.333                         | 1.000                 |
| ENAC                 |                               |                       |
| ER stress            |                               |                       |
| ERK1/2               |                               |                       |
| Fatty acid synthesis |                               |                       |
| FKHR                 |                               |                       |
| FKHRL1               | 0.000                         | 1.000                 |
| FYN                  | 8.207                         | 0.016                 |
| GAB1                 | 11.223                        | 0.004                 |
| Glucose              |                               |                       |
| GLUT4                | 0.188                         | 1.000                 |
| GRB10                | 3.968                         | 0.139                 |
| GRB2                 | 50.205                        | <0.001                |
| GSK3                 |                               |                       |
| GYS                  |                               |                       |
| INSR                 | 34.960                        | <0.001                |
| INSULIN              |                               |                       |
| IRS                  |                               |                       |
| IRS1                 | 0.001                         | 1.000                 |
| JAK1/2               |                               |                       |
| JNK1                 | 0.001                         | 1.000                 |
| LAR                  | 0.000                         | 1.000                 |
| LIPE                 | 16.254                        | <0.001                |
| Lipolysis            |                               |                       |

|                         |         |        |
|-------------------------|---------|--------|
| MEK1/2                  |         |        |
| mTOR                    | 41.010  | <0.001 |
| NCK                     | 9.400   | 0.009  |
| p70 S6K                 |         |        |
| PDE3B                   | 105.839 | <0.001 |
| PDK1                    | 0.000   | 1.000  |
| PI3K                    |         |        |
| PIK3R1                  | 22.707  | <0.001 |
| PIK3R2                  | 20.576  | <0.001 |
| PIP2                    |         |        |
| PIP3                    |         |        |
| PKA                     |         |        |
| PKC( $\lambda, \zeta$ ) |         |        |
| PP1                     |         |        |
| Protein synthesis       |         |        |
| PTEN                    | 0.019   | 1.000  |
| PTP1B                   | 14.851  | 0.001  |
| RAPTOR                  | 0.318   | 1.000  |
| RAS                     |         |        |
| SGK                     | 0.110   | 1.000  |
| SHC                     | 0.000   | 1.000  |
| SHIP                    |         |        |
| SHP2                    | 9.205   | 0.009  |
| SOCS3                   | 0.000   | 1.000  |
| Sodium transport        |         |        |
| SOS                     |         |        |
| STX4                    | 0.000   | 1.000  |
| SYNIP                   | 0.000   | 1.000  |
| TC10                    | 31.276  | <0.001 |
| Transcription           |         |        |
| TSC1                    | 4.121   | 0.129  |
| Tsc1-Tsc2               |         |        |
| TSC2                    | 31.417  | <0.001 |
| VAMP2                   | 3.423   | 0.185  |

554

**Table S3.** mTOR signaling pathway overlaid with the likelihood-ratio test statistics ( $2\Delta L$ ) between the positive and neutral branch-models as a measure to visualize a pathway effect.

| Symbol                                         | $2\Delta L$ | $p$ -value |
|------------------------------------------------|-------------|------------|
| 40S Ribosome-eIF3-mRNA-eIF4A-eIF4B-eIF4E-eIF4G |             |            |
| 40SRibosome                                    |             |            |
| 4EBP                                           | 0.000       | 1.000      |
| 4EBP-eIF4E                                     |             |            |
| Actin organization                             |             |            |

|                            |         |        |
|----------------------------|---------|--------|
| AKT                        |         |        |
| AMP                        |         |        |
| AMPK                       |         |        |
| ATG13                      | 24.238  | <0.001 |
| Autophagy regulation       |         |        |
| DAG                        |         |        |
| DGK $\zeta$                | 4.209   | 0.124  |
| eIF3                       |         |        |
| eIF4A                      |         |        |
| eIF4A-eIF4B-eIF4E-eIF4G    |         |        |
| eIF4B                      | 232.205 | <0.001 |
| eIF4E                      | 0.333   | 1.000  |
| eIF4G                      |         |        |
| ERK1/2                     |         |        |
| FKBP1                      | 0.010   | 1.000  |
| GBL                        | 20.882  | <0.001 |
| HIF1 $\alpha$              | 0.000   | 1.000  |
| Hypoxia                    |         |        |
| INSR                       | 34.960  | <0.001 |
| INSULIN                    |         |        |
| IRS1                       | 0.001   | 1.000  |
| LKB1                       | 11.489  | 0.003  |
| mTOR                       | 41.010  | <0.001 |
| mTORC1                     |         |        |
| mTORC2                     |         |        |
| Neurodegenerative diseases |         |        |
| p70S6K                     | 292.275 | <0.001 |
| PA                         |         |        |
| PC                         |         |        |
| PDK1                       | 0.000   | 1.000  |
| PI3K                       |         |        |
| PIP2                       |         |        |
| PIP3                       |         |        |
| PKC                        |         |        |
| PKC $\alpha$               | 383.006 | <0.001 |
| PLD                        |         |        |
| PMA                        |         |        |
| PP2A                       |         |        |
| PRAS40                     | 0.000   | 1.000  |
| PROTOR                     |         |        |
| RAC                        | 3.675   | 0.161  |
| Rapamycin                  |         |        |
| RAPTOR                     | 0.318   | 1.000  |
| RAS                        |         |        |
| REDD1                      | 0.000   | 1.000  |
| RHEB                       | 42.036  | <0.001 |

|             |         |        |
|-------------|---------|--------|
| RHO         |         |        |
| RICTOR      | 472.142 | <0.001 |
| RPS6        | 1.495   | 0.531  |
| RSK         |         |        |
| SIN1        | 10.430  | 0.005  |
| Translation |         |        |
| TSC1        | 4.121   | 0.129  |
| Tsc1-Tsc2   |         |        |
| TSC2        | 31.417  | <0.001 |
| ULK1        | 0.000   | 1.000  |
| VEGF        |         |        |

555

**Table S4.** NF- $\kappa$ B signaling pathway overlaid with the likelihood-ratio test statistics ( $2\Delta L$ ) between the positive and neutral branch-models as a measure to visualize a pathway effect.

| <b>Symbol</b>          | <b><math>2\Delta L</math></b> | <b><i>p</i>-value</b> |
|------------------------|-------------------------------|-----------------------|
| $\beta$ -TrCP          | 77.820                        | <0.001                |
| A20                    | 0.000                         | 1.000                 |
| ABIN-1                 | 4.063                         | 0.132                 |
| AKT                    |                               |                       |
| B-cell maturation      |                               |                       |
| BAFF                   | 5.391                         | 0.066                 |
| Bcl10                  | 0.000                         | 1.000                 |
| Bcl10-Card10-Malt1     |                               |                       |
| BIMP1                  | 4.177                         | 0.125                 |
| BMP2/4                 |                               |                       |
| BR3                    | 5.818                         | 0.053                 |
| CARD11                 | 1.116                         | 0.639                 |
| Caspase8               | 0.904                         | 0.723                 |
| CBP/p300               |                               |                       |
| CD40                   | 24.403                        | <0.001                |
| CD40L                  | 11.317                        | 0.004                 |
| Cell proliferation     |                               |                       |
| Cell survival          |                               |                       |
| Chuk-Ikbbk-Ikbbkg      |                               |                       |
| CK2                    |                               |                       |
| Cot                    | 0.624                         | 0.876                 |
| EGF                    | 3.083                         | 0.219                 |
| FADD                   | 0.000                         | 1.000                 |
| GH                     | 0.000                         | 1.000                 |
| Growth factor receptor |                               |                       |
| GSK-3 $\beta$          | 55.087                        | <0.001                |

|                                  |         |        |
|----------------------------------|---------|--------|
| HDAC1/2                          |         |        |
| I $\kappa$ B                     |         |        |
| I $\kappa$ B-Nf $\kappa$ B1-RelA |         |        |
| I $\kappa$ B-Nf $\kappa$ B2-RelA |         |        |
| IKK $\alpha$                     | 129.661 | <0.001 |
| IKK $\beta$                      | 0.014   | 1.000  |
| IKK $\gamma$                     | 2.158   | 0.368  |
| IL-1                             |         |        |
| IL-1R/TLR                        |         |        |
| Immune response                  |         |        |
| Inflammation                     |         |        |
| Insulin                          |         |        |
| IRAK1/4                          |         |        |
| IRAK-M                           | 0.000   | 1.000  |
| JNK1                             | 0.001   | 1.000  |
| LCK                              | 0.000   | 1.000  |
| LTA                              | 1.123   | 0.639  |
| LTBR                             | 570.904 | <0.001 |
| Lymphogenesis                    |         |        |
| MALT1                            | 0.000   | 1.000  |
| MEKK1                            | 0.000   | 1.000  |
| MEKK3/NIK                        |         |        |
| MKK6/7                           |         |        |
| MYD88                            | 1.355   | 0.566  |
| NAK                              | 0.023   | 1.000  |
| NAP1                             | 0.208   | 1.000  |
| NF- $\kappa$ B p50/p52           |         |        |
| NF- $\kappa$ B1                  | 0.000   | 1.000  |
| NF- $\kappa$ B2 p100             | 0.000   | 1.000  |
| Nf $\kappa$ B-RelA               |         |        |
| Nf $\kappa$ B1-RelA              |         |        |
| Nf $\kappa$ B2(p52)-RelB         |         |        |
| NGF                              | 0.145   | 1.000  |
| NIK                              |         |        |
| p65/RelA                         | 0.000   | 1.000  |
| PELI1                            | 0.000   | 1.000  |
| PI3K                             |         |        |
| PKAc                             |         |        |
| PKC( $\beta$ , $\theta$ )        |         |        |
| PKC $\zeta$                      | 31.135  | <0.001 |
| PKR                              | 0.000   | 1.000  |
| PLC $\gamma$ 2                   | 0.000   | 1.000  |
| Raf                              |         |        |
| RANKL                            | 1.048   | 0.670  |
| Ras                              |         |        |
| RelB                             | 0.500   | 0.945  |

|               |        |       |
|---------------|--------|-------|
| RIP           | 5.280  | 0.070 |
| TAB1          | 9.539  | 0.008 |
| TAB2/3        |        |       |
| TAK1          | 1.581  | 0.504 |
| TANK          | 8.987  | 0.010 |
| TCR           |        |       |
| TGF- $\alpha$ | 1.477  | 0.535 |
| TIRAP         | 0.000  | 1.000 |
| TNF- $\alpha$ | 0.420  | 1.000 |
| TNFR          |        |       |
| TRADD         | 2.123  | 0.375 |
| TRAF2/3/5     |        |       |
| TRAF5/6       |        |       |
| TRAF2         | 0.000  | 1.000 |
| TRAF6         | 1.795  | 0.444 |
| TTRAP         | 0.000  | 1.000 |
| UBE2N         | 0.011  | 1.000 |
| Ube2n-Ube2v1  |        |       |
| UBE2V1        | 0.000  | 1.000 |
| Zap70         | 11.445 | 0.003 |

556

557

**Table S5.** SIRT signaling pathway overlaid with the likelihood-ratio test statistics ( $2\Delta L$ ) between the positive and neutral branch-models as a measure to visualize a pathway effect.

| <b>Symbol</b>              | <b><math>2\Delta L</math></b> | <b><math>p</math>-value</b> |
|----------------------------|-------------------------------|-----------------------------|
| ACADL                      | 0.000                         | 1.000                       |
| ACSS1                      | 0.260                         | 1.000                       |
| Alpha tubulin              |                               |                             |
| Alzheimer disease          |                               |                             |
| Apaf1-Cycs                 |                               |                             |
| ARNTL                      | 3.815                         | 0.149                       |
| Biogenesis of mitochondria |                               |                             |
| BIRC5                      | 7.876                         | 0.019                       |
| Cancers and Tumors         |                               |                             |
| CDKN1A                     | 0.000                         | 1.000                       |
| Cell death                 |                               |                             |
| Cell survival              |                               |                             |
| Circadian rhythm           |                               |                             |
| CPS1                       |                               |                             |
| CRTC2                      | 0.001                         | 1.000                       |

|                         |         |        |
|-------------------------|---------|--------|
| CTNNB1                  | 0.001   | 1.000  |
| CYC1                    | 0.000   | 1.000  |
| CYCS                    | 0.000   | 1.000  |
| Cyct                    |         |        |
| cytochrome C            |         |        |
| DNA damage              |         |        |
| E2F1                    | 1.341   | 0.566  |
| EPAS1                   | 0.001   | 1.000  |
| Feeding                 |         |        |
| Foxo                    |         |        |
| FOXO1                   | 0.000   | 1.000  |
| FOXO3                   | 0.000   | 1.000  |
| FOXO4                   | 0.000   | 1.000  |
| FOXO6                   | 0.000   | 1.000  |
| Gluconeogenesis         |         |        |
| GLUD1                   | 6.982   | 0.030  |
| HCRTR2                  | 0.000   | 1.000  |
| HIF1A                   | 0.000   | 1.000  |
| HSF1                    | 0.000   | 1.000  |
| Hypoxia                 |         |        |
| IDE                     | 0.000   | 1.000  |
| IDH2                    | 0.000   | 1.000  |
| Inflammation            |         |        |
| Insulin sensitivity     |         |        |
| Memory                  |         |        |
| MRPL10                  | 0.049   | 1.000  |
| NDUFA9                  | 0.000   | 1.000  |
| NFkB (complex)          |         |        |
| NFKB1                   | 0.000   | 1.000  |
| NFKB2                   | 0.000   | 1.000  |
| NR1H2                   | 0.000   | 1.000  |
| NR1H3                   | 0.000   | 1.000  |
| Oxidation of fatty acid |         |        |
| PARP1                   | 22.597  | <0.001 |
| PER2                    | 0.000   | 1.000  |
| PIP5K1A                 | 0.000   | 1.000  |
| PIP5K1C                 | 5.059   | 0.078  |
| PPARA                   | 17.202  | <0.001 |
| PPARG                   | 0.000   | 1.000  |
| PPARGC1A                | 0.164   | 1.000  |
| PPID                    | 33.429  | <0.001 |
| RARA                    | 0.287   | 1.000  |
| RARB                    | 242.778 | <0.001 |
| Rb                      |         |        |
| RB1                     | 61.629  | <0.001 |
| RBL1                    | 10.260  | 0.006  |



|                      |         |        |
|----------------------|---------|--------|
| RBL2                 | 53.656  | <0.001 |
| RELA                 | 0.000   | 1.000  |
| SDHA                 | 2.223   | 0.354  |
| SDHB                 | 14.946  | 0.001  |
| SIRT1                | 161.940 | <0.001 |
| SIRT2                | 0.001   | 1.000  |
| SIRT3                | 6.500   | 0.038  |
| SIRT4                | 0.282   | 1.000  |
| SIRT5                | 0.000   | 1.000  |
| SIRT6                | 8.713   | 0.012  |
| SIRT7                | 0.000   | 1.000  |
| SLC25A5              | 2.810   | 0.254  |
| SLC25A6              | 87.909  | <0.001 |
| SMAD7                | 64.800  | <0.001 |
| SREBF1               | 4.267   | 0.120  |
| SREBF2               | 0.935   | 0.714  |
| Suppression of tumor |         |        |
| TLE1                 | 0.000   | 1.000  |
| TP53                 | 0.000   | 1.000  |
| TSC2                 | 31.417  | <0.001 |
| TUBA1A               | 4.839   | 0.088  |
| TUBA1B               | 0.000   | 1.000  |
| TUBA1C               | 25.230  | <0.001 |
| TUBA3C/TUBA3D        | 11.106  | 0.004  |
| TUBA3E               | 10.283  | 0.006  |
| TUBA4A               | 0.000   | 1.000  |
| TUBA4B               |         |        |
| TUBA8                | 0.027   | 1.000  |
| UCP2                 | 0.000   | 1.000  |
| WRN                  | 6.106   | 0.046  |
| XRCC6                | 0.119   | 1.000  |

558

**Table S6.** P53 signaling pathway overlaid with the likelihood-ratio test statistics ( $2\Delta L$ ) between the positive and neutral branch-models as a measure to visualize a pathway effect.

| Symbol          | $2\Delta L$ | <i>p</i> -value |
|-----------------|-------------|-----------------|
| 14-3-3 $\sigma$ | 0.000       | 1.000           |
| AKT             |             |                 |
| Angiogenesis    |             |                 |
| Apaf1           | 1.169       | 0.625           |
| Apoptosis       |             |                 |
| ASPP            |             |                 |
| ATM             | 2.078       | 0.382           |

|                        |        |        |
|------------------------|--------|--------|
| ATR                    | 0.065  | 1.000  |
| Autophagy              |        |        |
| BAI1                   | 2.103  | 0.378  |
| BAX                    | 0.000  | 1.000  |
| Bcl-2                  | 0.077  | 1.000  |
| Bcl-xL                 | 0.000  | 1.000  |
| Brca1                  |        |        |
| CABC1                  |        |        |
| Caspase 6              |        |        |
| CDK2                   | 0.347  | 1.000  |
| CDK2-Cyclin D1         |        |        |
| CDK4                   | 0.000  | 1.000  |
| CDK4-Cyclin D2         |        |        |
| Cell cycle arrest      |        |        |
| Cell cycle progression |        |        |
| Cell survival          |        |        |
| Chk1                   | 0.000  | 1.000  |
| Chk2                   | 0.001  | 1.000  |
| c-Jun                  | 2.366  | 0.327  |
| CK1δ                   |        |        |
| Cyclin D1              | 0.014  | 1.000  |
| Cyclin D2              | 0.010  | 1.000  |
| CyclinG                | 13.155 | 0.001  |
| CyclinK                |        |        |
| DNA damage             |        |        |
| DNA repair             |        |        |
| DNA-PK                 |        |        |
| DR4/5                  |        |        |
| DRAM                   |        |        |
| E2F1                   | 1.341  | 0.566  |
| E2f1-Rb                |        |        |
| FAS                    | 1.763  | 0.450  |
| GADD45                 |        |        |
| Glycolysis             |        |        |
| GML                    |        |        |
| Gsk3β                  | 55.087 | <0.001 |
| HDAC                   |        |        |
| HDAC9                  |        |        |
| HIF1A                  | 0.000  | 1.000  |
| HIPK2                  |        |        |
| Hypoxia                |        |        |
| JMY                    |        |        |
| Jmy-p300               |        |        |
| JNK1                   | 0.001  | 1.000  |
| Maspin                 | 0.223  | 1.000  |
| MDM2                   | 0.000  | 1.000  |

|                           |         |        |
|---------------------------|---------|--------|
| MDM4                      | 0.001   | 1.000  |
| Mitochondrial respiration |         |        |
| NOXA                      | 9.495   | 0.008  |
| Nucleostemin              |         |        |
| p19arf                    | 23.352  | <0.001 |
| p21Cip1                   | 0.000   | 1.000  |
| p300                      |         |        |
| p38 MAPK                  |         |        |
| p48                       |         |        |
| p53                       | 0.000   | 1.000  |
| p53AIP1                   |         |        |
| p53R2                     | 0.018   | 1.000  |
| p63                       |         |        |
| p73                       | 0.564   | 0.915  |
| PAI-1                     |         |        |
| PCAF                      |         |        |
| PCNA                      |         |        |
| PERP                      | 22.105  | <0.001 |
| PI3K                      |         |        |
| PIAS1                     |         |        |
| PIDD                      | 0.001   | 1.000  |
| PIG3                      | 18.848  | <0.001 |
| PML                       |         |        |
| PTEN                      | 0.019   | 1.000  |
| PUMA                      | 33.998  | <0.001 |
| Rb                        | 61.629  | <0.001 |
| Reprimo                   | 0.000   | 1.000  |
| SCO2                      |         |        |
| Senescence                |         |        |
| SIRT                      | 161.940 | <0.001 |
| Slug                      |         |        |
| STAG1                     |         |        |
| Survivin                  | 7.876   | 0.019  |
| Teap                      |         |        |
| TIGAR                     |         |        |
| TOPBP1                    |         |        |
| TRAP220                   |         |        |
| TRIM29                    |         |        |
| TSP1                      | 0.016   | 1.000  |
| Tumor suppression         |         |        |
| UCN-01                    |         |        |
| WT1                       |         |        |
| ZAC1                      |         |        |
| β-catenin                 | 0.001   | 1.000  |

**Table S7.** Insulin signaling pathway overlaid with the likelihood-ratio test statistics ( $2\Delta L$ ) between the positive and neutral branch-models as a measure to visualize a pathway effect.

| <b>Symbol</b>      | <b><math>2\Delta L</math></b> | <b><math>p</math>-value</b> |
|--------------------|-------------------------------|-----------------------------|
| AKT                |                               |                             |
| BCL-XL             | 0.000                         | 1.000                       |
| c-FOS              | 0.000                         | 1.000                       |
| c-JUN              | 2.366                         | 0.327                       |
| c-Raf              | 105.387                       | <0.001                      |
| CCK2R              | 0.000                         | 1.000                       |
| CEBP $\beta$       | 0.000                         | 1.000                       |
| Cell proliferation |                               |                             |
| CIS                | 0.000                         | 1.000                       |
| ERK1/2             |                               |                             |
| G $\alpha$ q       | 0.000                         | 1.000                       |
| GAST               | 2.472                         | 0.311                       |
| GRB2               | 50.205                        | <0.001                      |
| IL-6               | 48.957                        | <0.001                      |
| JAK                |                               |                             |
| JAK2               | 0.043                         | 1.000                       |
| LEP                | 0.000                         | 1.000                       |
| LEPR               | 0.000                         | 1.000                       |
| MEK1/2             |                               |                             |
| mTOR               | 41.010                        | <0.001                      |
| NF $\kappa$ B      |                               |                             |
| p21Cip1            | 0.000                         | 1.000                       |
| PI3K               |                               |                             |
| PIAS               |                               |                             |
| PTP1B              | 14.851                        | 0.001                       |
| Ras                |                               |                             |
| SHC                | 0.000                         | 1.000                       |
| SHP1               | 0.000                         | 1.000                       |
| SHP2               | 9.205                         | 0.009                       |
| SOCS               |                               |                             |
| SOS                |                               |                             |
| STAT               |                               |                             |
| Stat dimer         |                               |                             |
| STAT3              | 2.391                         | 0.323                       |
| Stat3 dimer        |                               |                             |
